# Supplementary material for: Exploring the self-assembly dynamics of novel steroid–coumarin conjugates: a comprehensive spectroscopic and solid-state investigation
Source: Royal Society of Chemistry journal article supplement (doi:10.1039/d4ob00192c), 2024-01-01
Supplement: d4ob00192c1.pdf [file d4ob00192c1.pdf]

# Exploring the Self-Assembly Dynamics of Novel Steroid-Coumarin Conjugates: A Comprehensive Spectroscopic and Solid-State Investigation

Claudia M. Ramírez-Lozano,<sup>a</sup> Ma. Eugenia Ochoa,<sup>a</sup> Pablo Labra-Vázquez,<sup>b</sup> Arturo Jiménez-Sánchez,<sup>c</sup> Norberto Farfán,<sup>d</sup> Rosa Santillan\*<sup>a</sup>

<sup>a</sup> Departamento de Química, Centro de Investigación y de Estudios Avanzados del IPN, Apdo. Postal 14-740, 07000, México.

<sup>b</sup> CIRIMAT, Université de Toulouse, CNRS, Université Toulouse 3 – Paul Sabatier, 118 Route de Narbonne, 31062, Toulouse, Cedex 9, France.

<sup>c</sup> Instituto de Química, Universidad Nacional Autónoma de México, Circuito Exterior, Ciudad Universitaria, Coyoacán, Ciudad de México 04510, Mexico.

<sup>d</sup> Facultad de Química, Departamento de Química Orgánica, Universidad Nacional Autónoma de México, 04510 CDMX, México.

Corresponding author: rsantil@cinvestav.mx

## Index

|                                                                                                                                                        |        |
|--------------------------------------------------------------------------------------------------------------------------------------------------------|--------|
| Figures S1-S21. <sup>1</sup> H, <sup>13</sup> C NMR, and MS spectra of fluorescent probes <b>1b</b> to <b>7a</b>                                       | 2-22   |
| Figure S22. Solvathochromic study of compound <b>2b</b>                                                                                                | 23     |
| Figure S23. Concentration study of compound <b>3b</b> in 1,4-dioxane                                                                                   | 23     |
| Figure S24. Concentration study of compounds <b>1b</b> , <b>2b</b> and <b>4b</b> in 1,4-dioxane                                                        | 24     |
| Figure S25. Concentration study of compounds <b>5b</b> , <b>6a</b> and <b>7a</b> in 1,4-dioxane                                                        | 25     |
| Figure S26-S32. Aggregation studies in 1,4-dioxane:water mixtures of compounds <b>1b</b> , <b>3b</b> , <b>4b</b> , <b>5b</b> , <b>6a</b> and <b>7a</b> | 26-32  |
| Table S1. Crystal Structure and Refinement Data of compounds <b>1b</b> , <b>2b</b> , <b>5b</b> and <b>6a</b>                                           | 33     |
| Table S2. Hydrogen-bonding parameters (Å, °) for <b>1b</b> , <b>2b</b> , <b>5b</b> and <b>6a</b>                                                       | 34     |
| Figure S33-S36. Unit cell and hydrogen bonds interactions of compounds <b>1b</b> , <b>2b</b> , <b>5b</b> and <b>6a</b>                                 | 35, 36 |
| Figure S37, S38. Colocalization images of compounds <b>6a</b> , <b>5b</b> , <b>2b</b> and <b>1b</b>                                                    | 37     |
| Figure S39-S42. Fluorescence microscopy images of compound <b>3b</b> , <b>4b</b> and <b>7a</b> in U-251 cells                                          | 38-42  |

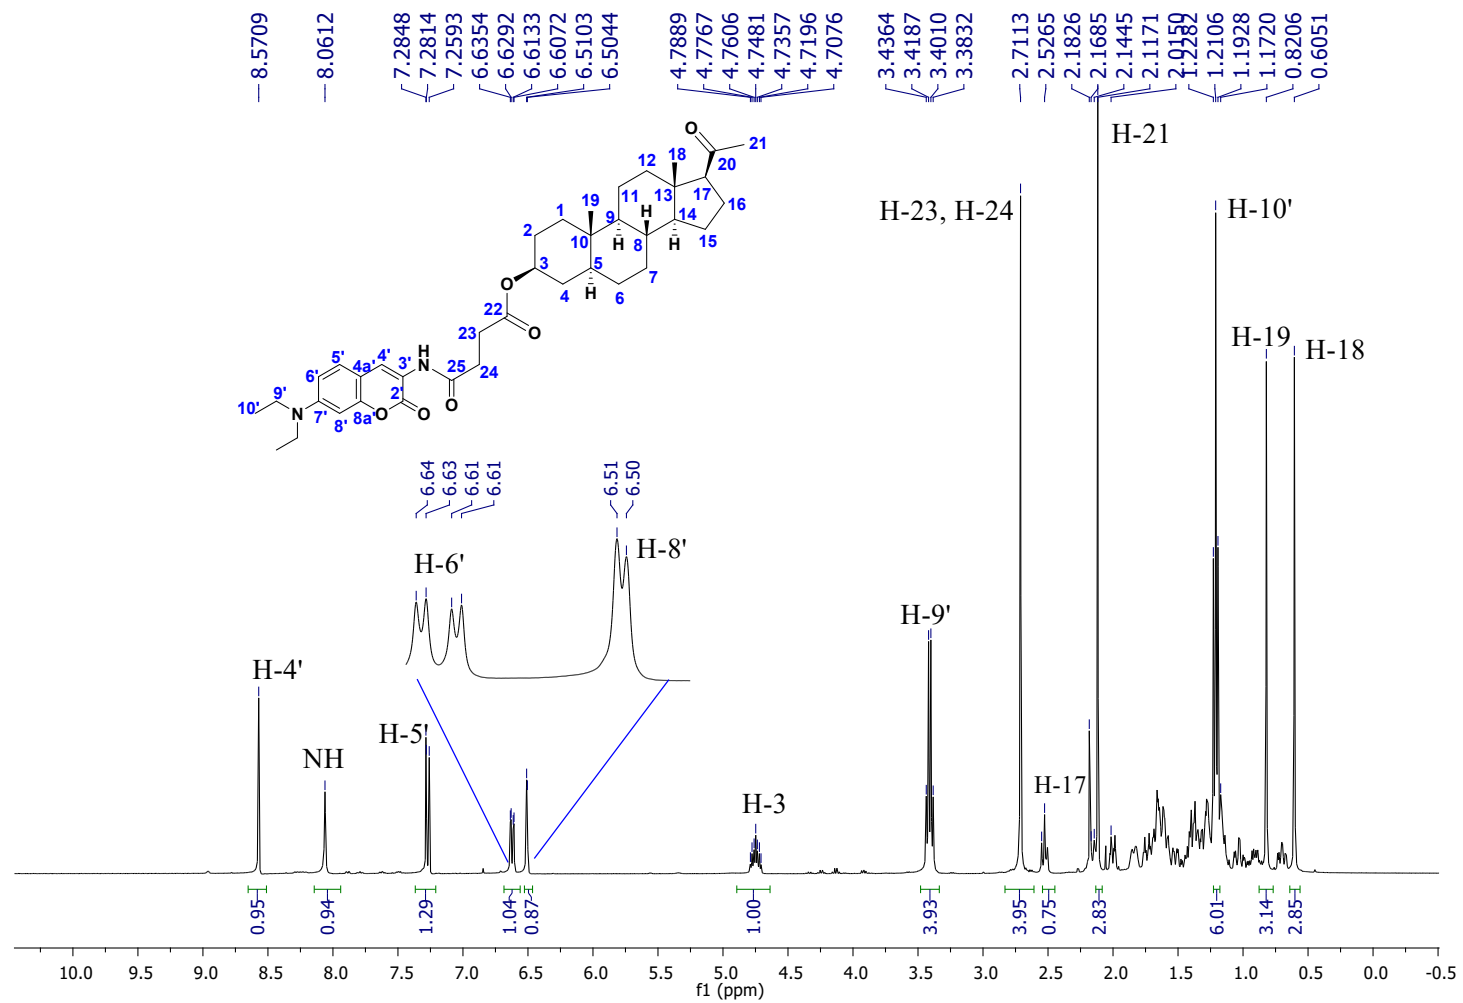

Figure S1. <sup>1</sup>H-NMR spectrum (CDCl<sub>3</sub>, 400 MHz) for **1b**.

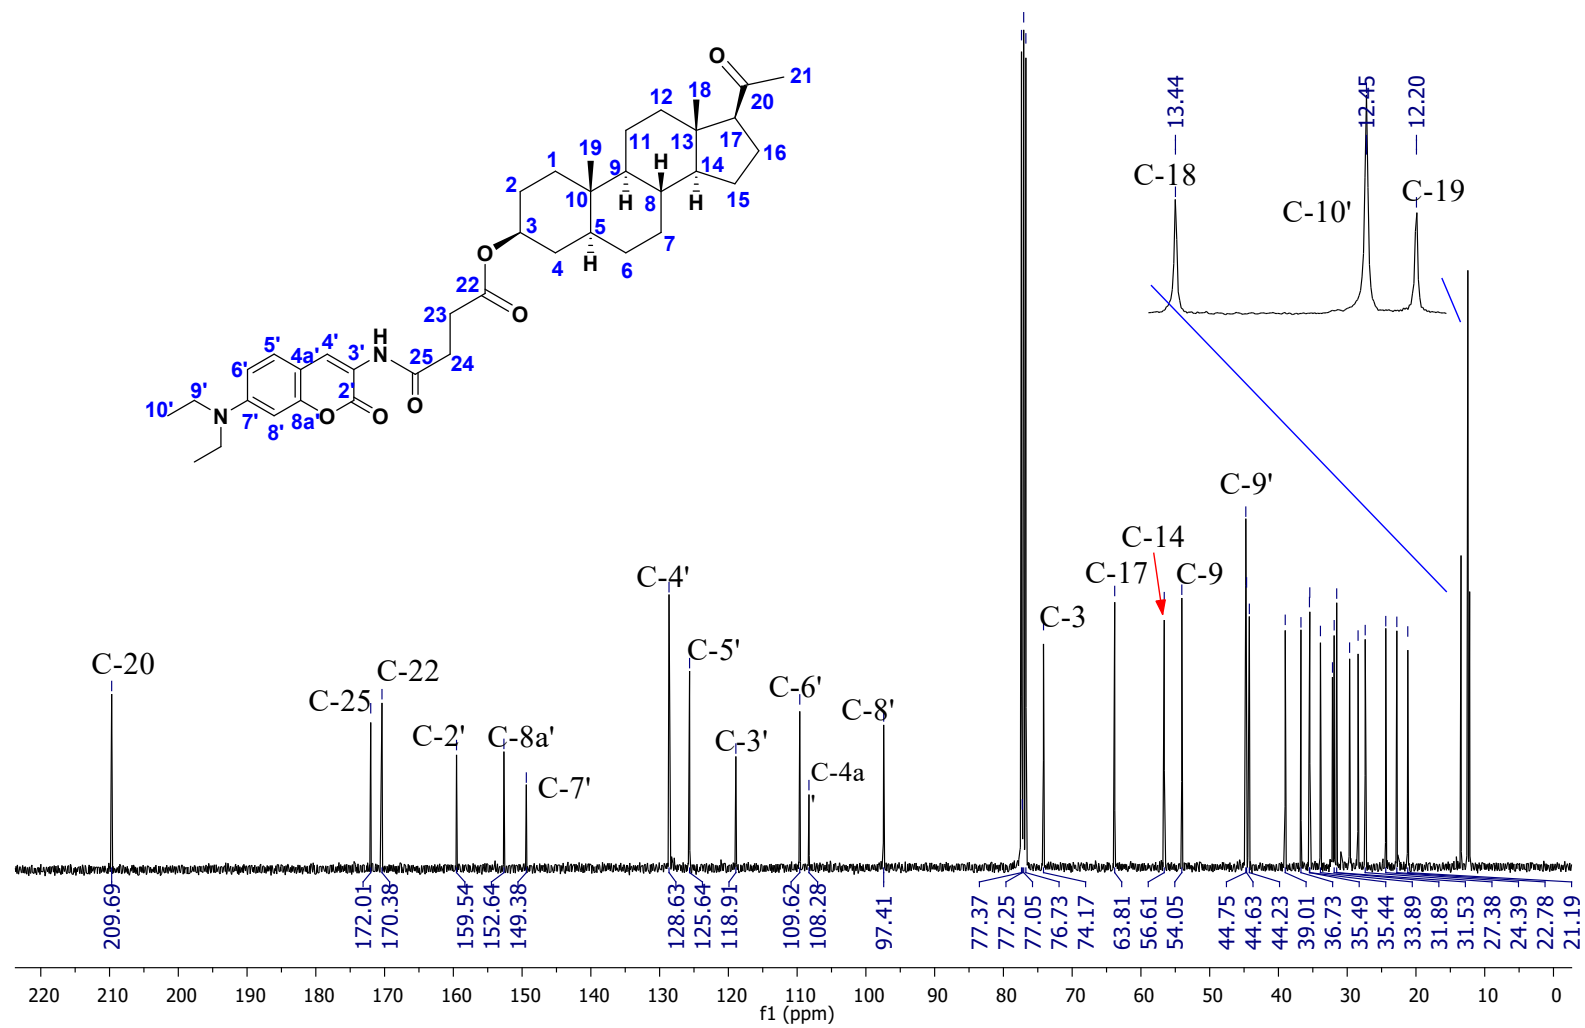

Figure S2. <sup>13</sup>C-NMR spectrum (CDCl<sub>3</sub>, 100.5 MHz) for **1b**.

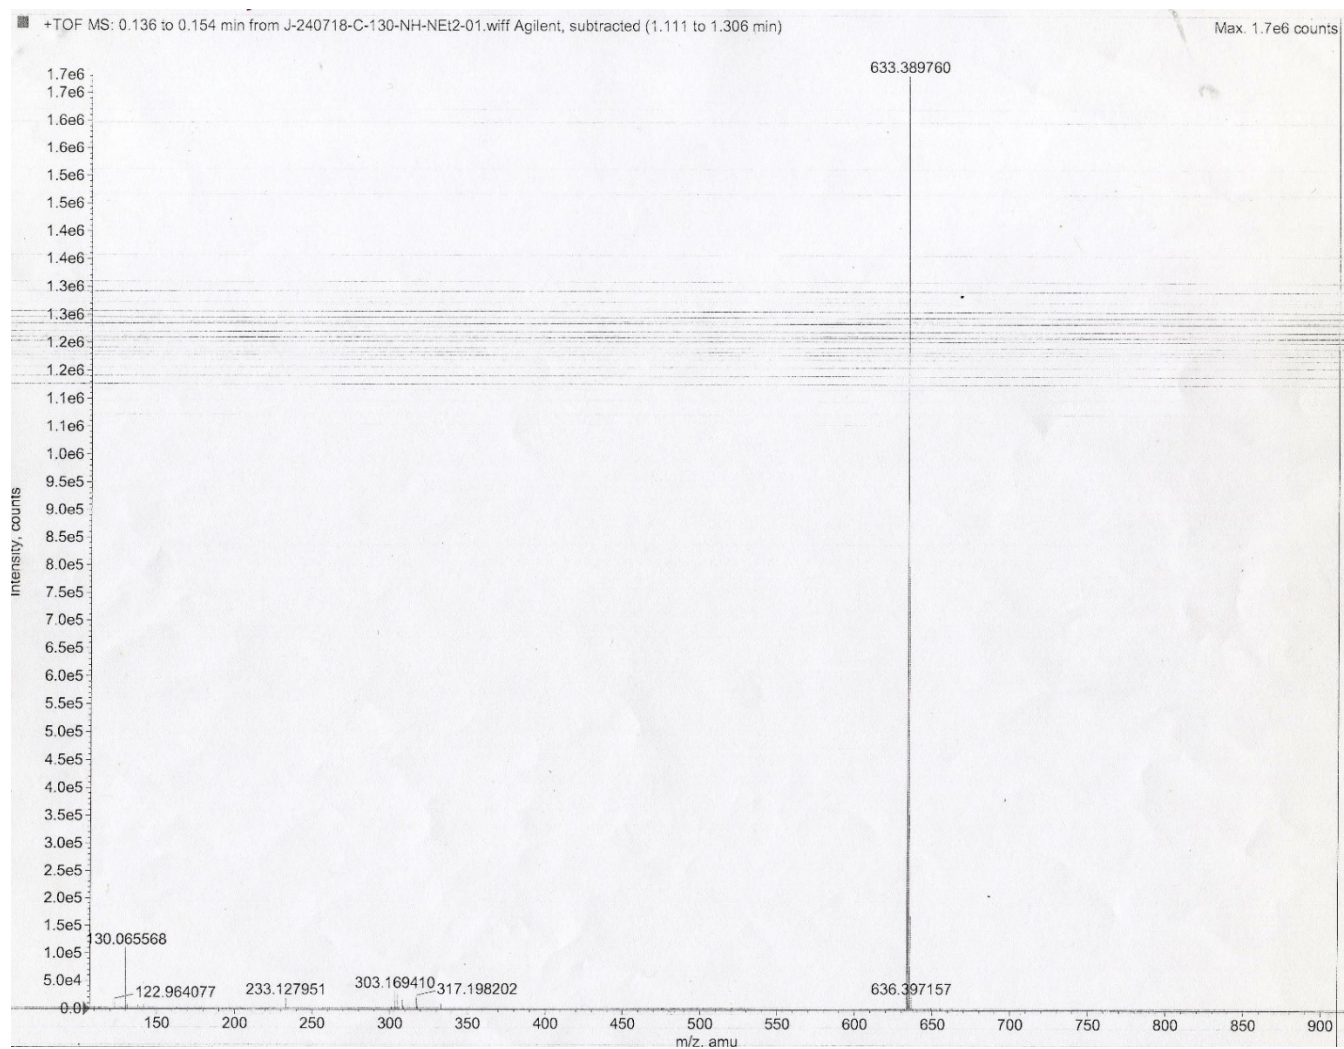

**Figure S3.** HRMS (ESI-TOF<sup>+</sup>) spectrum for **1b**.

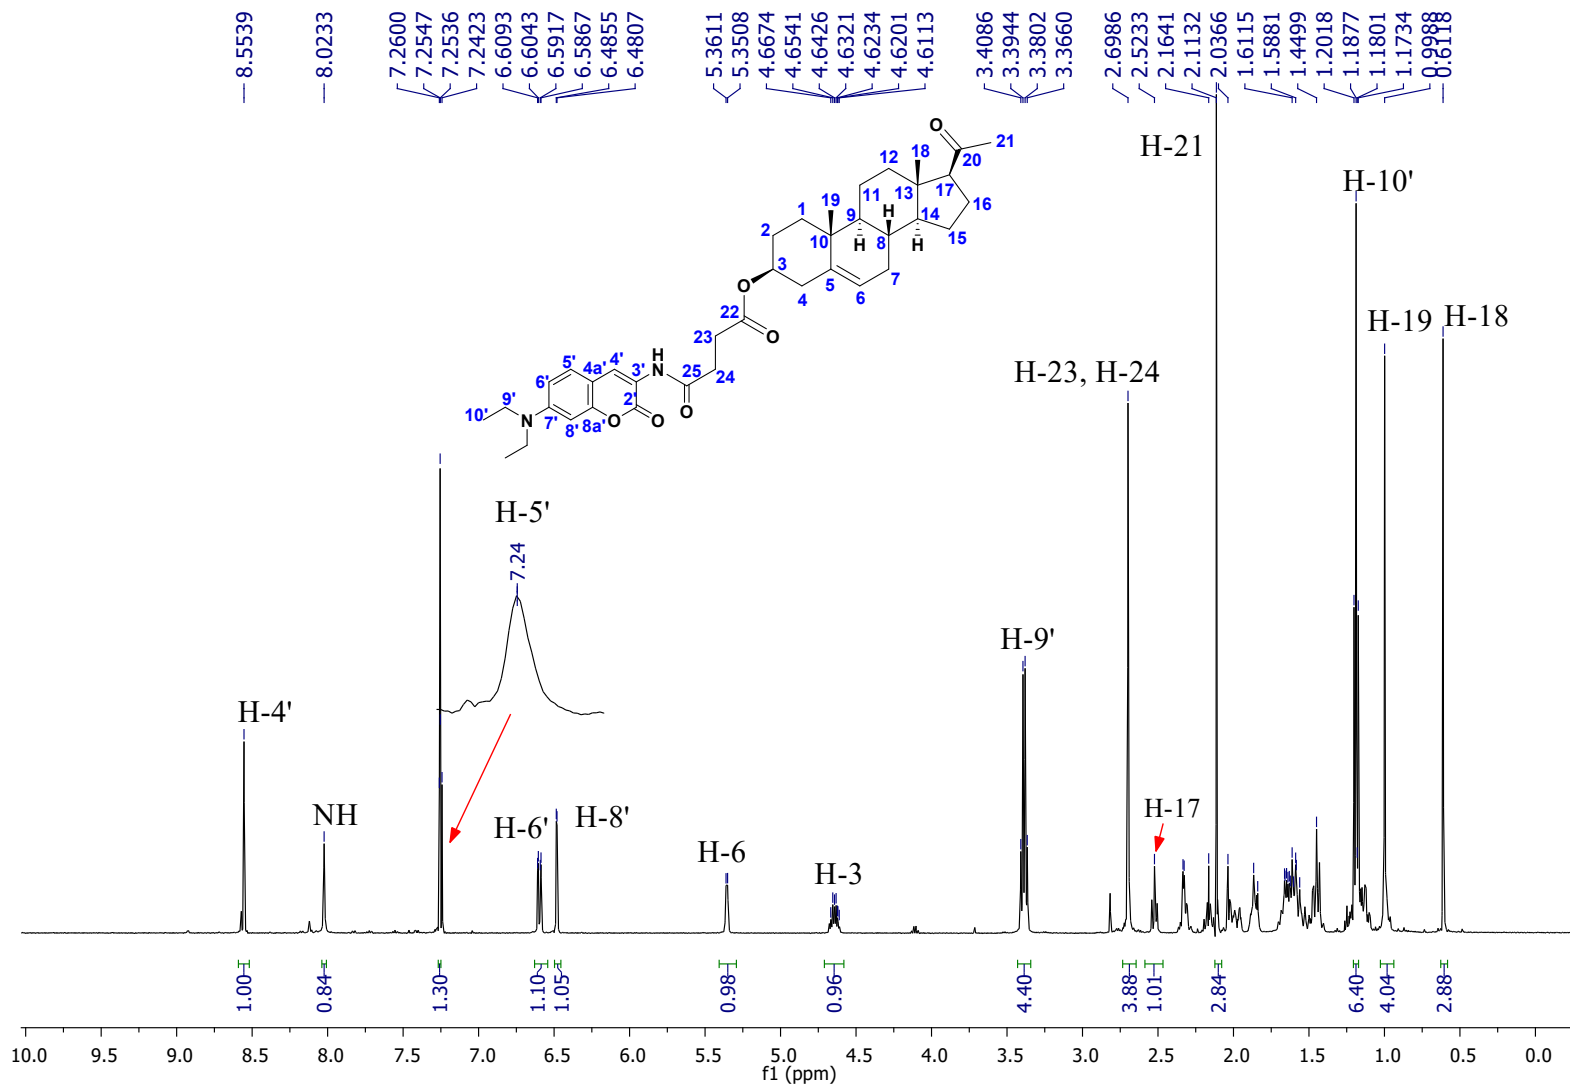

Figure S4. <sup>1</sup>H-NMR spectrum (CDCl<sub>3</sub>, 500 MHz) for **2b**.

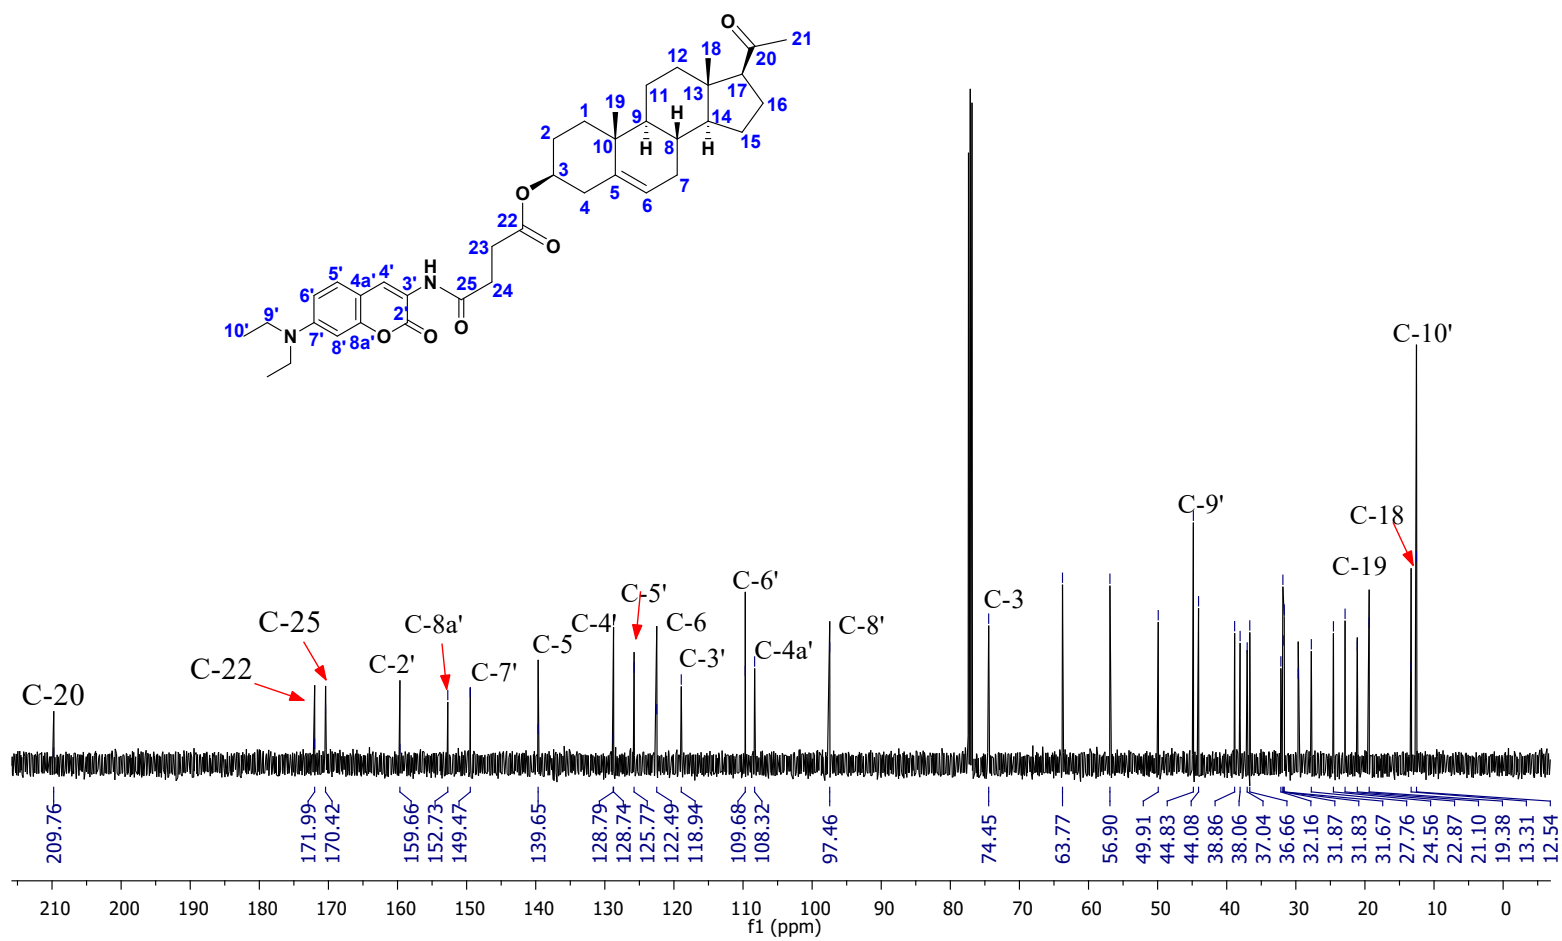

Figure S5.  $^{13}\text{C}$ -NMR spectrum (CDCl<sub>3</sub>, 125.76 MHz) for **2b**.

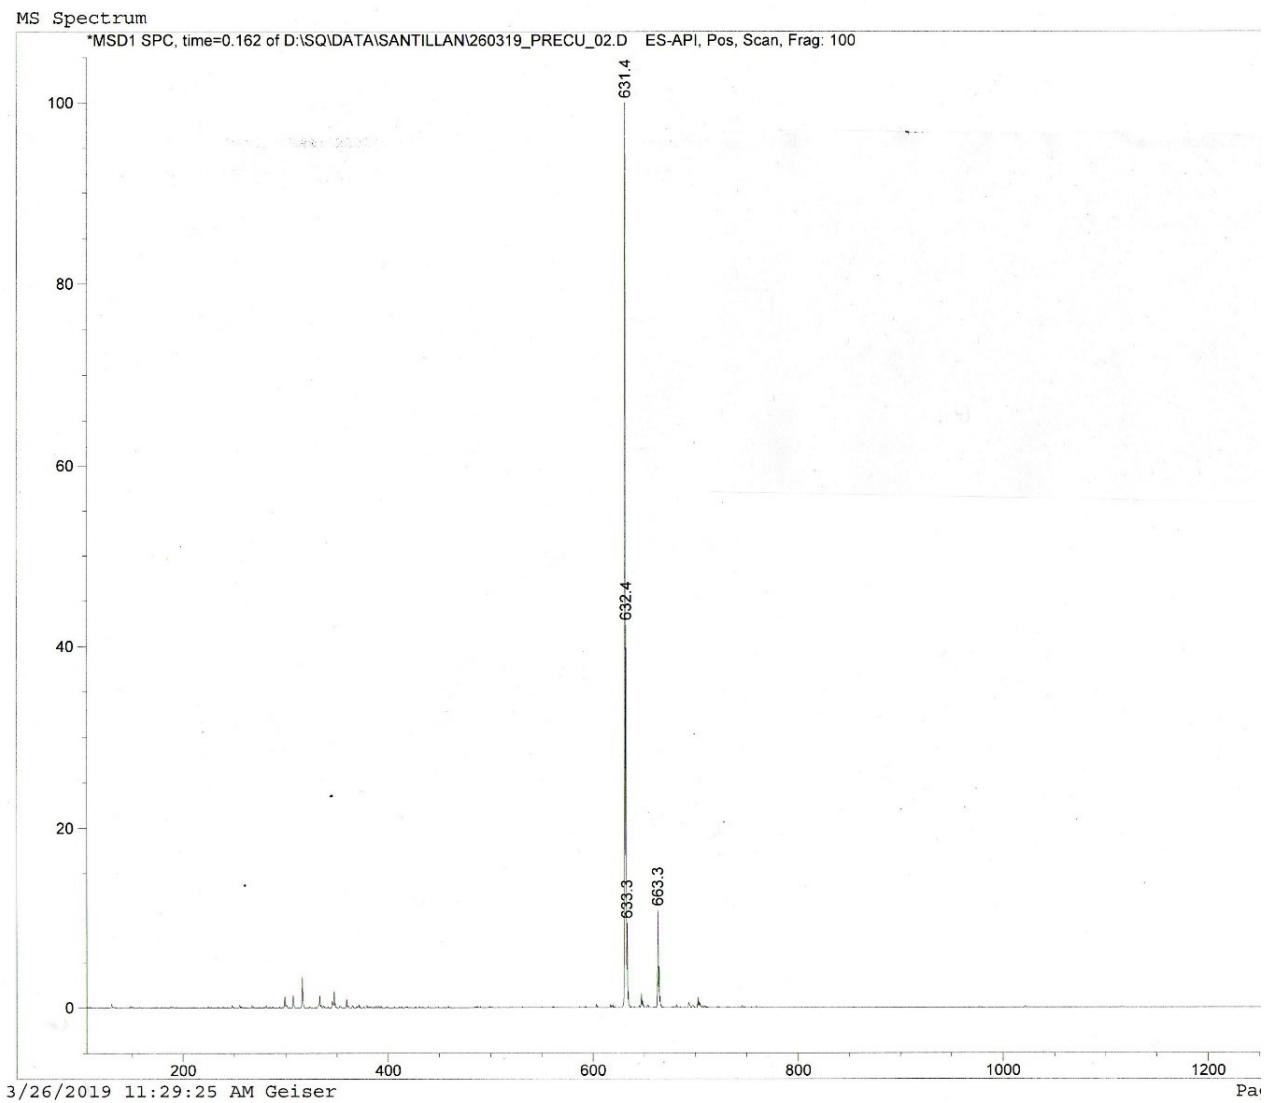

Figure S6. MS (ESI) spectrum for **2b**.

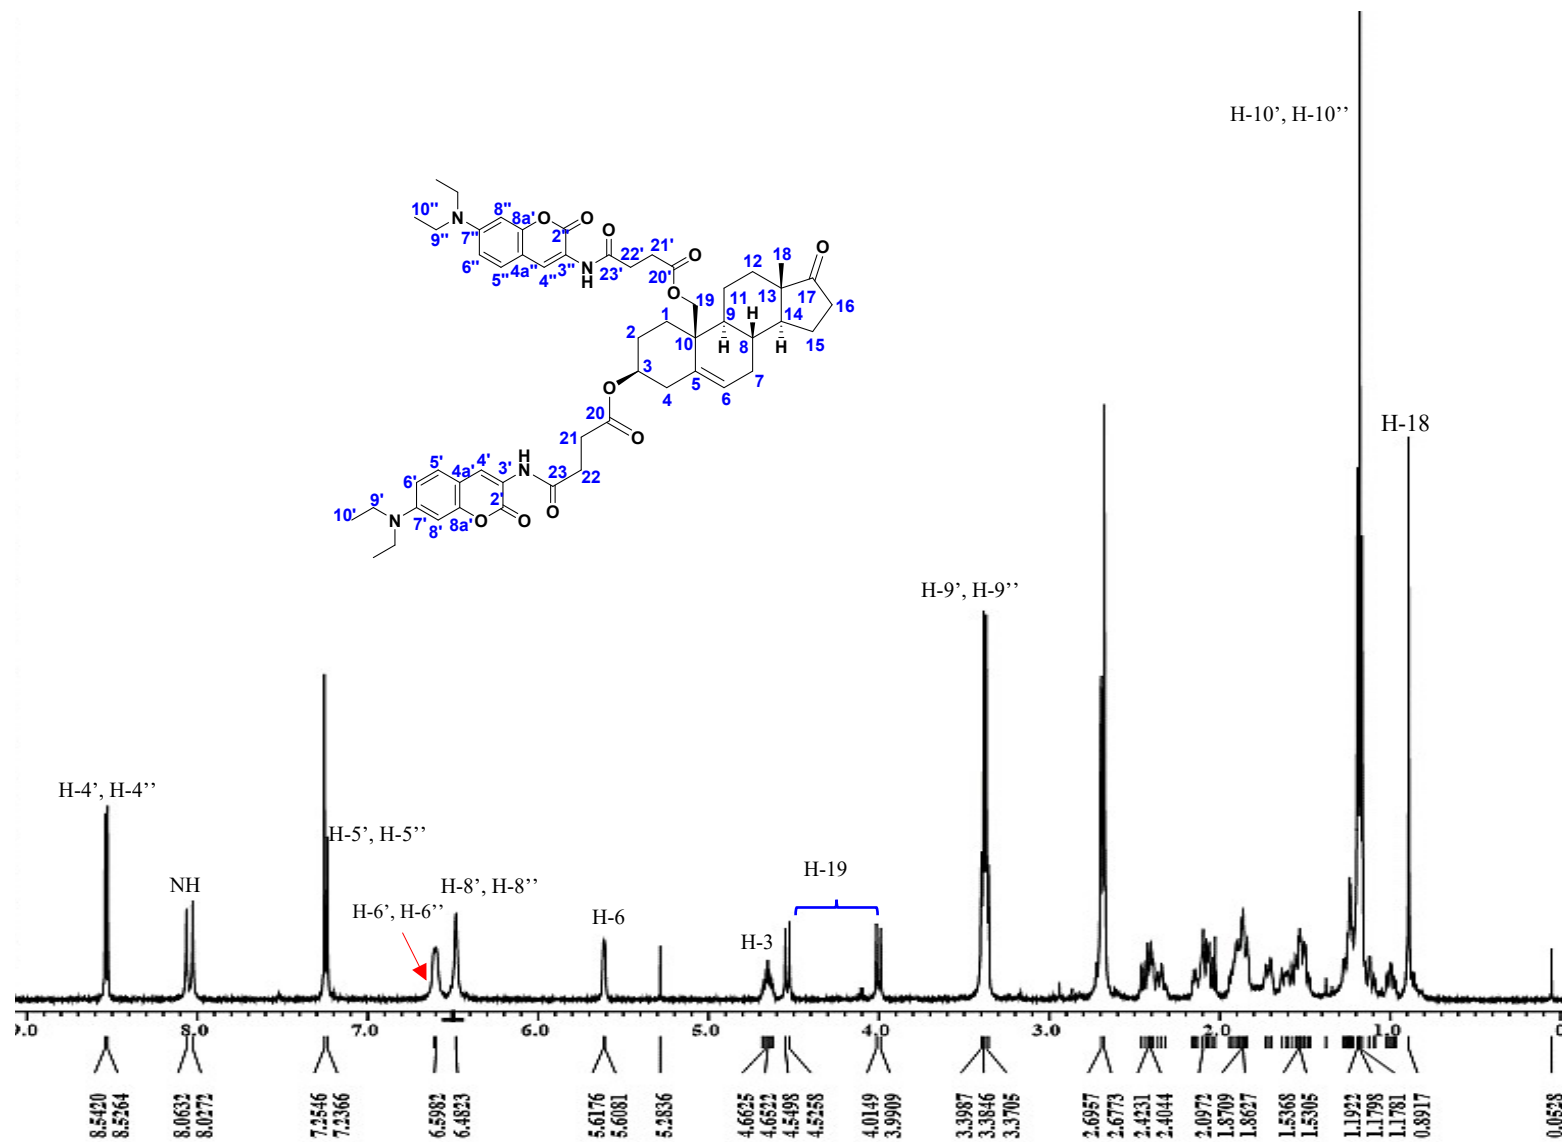



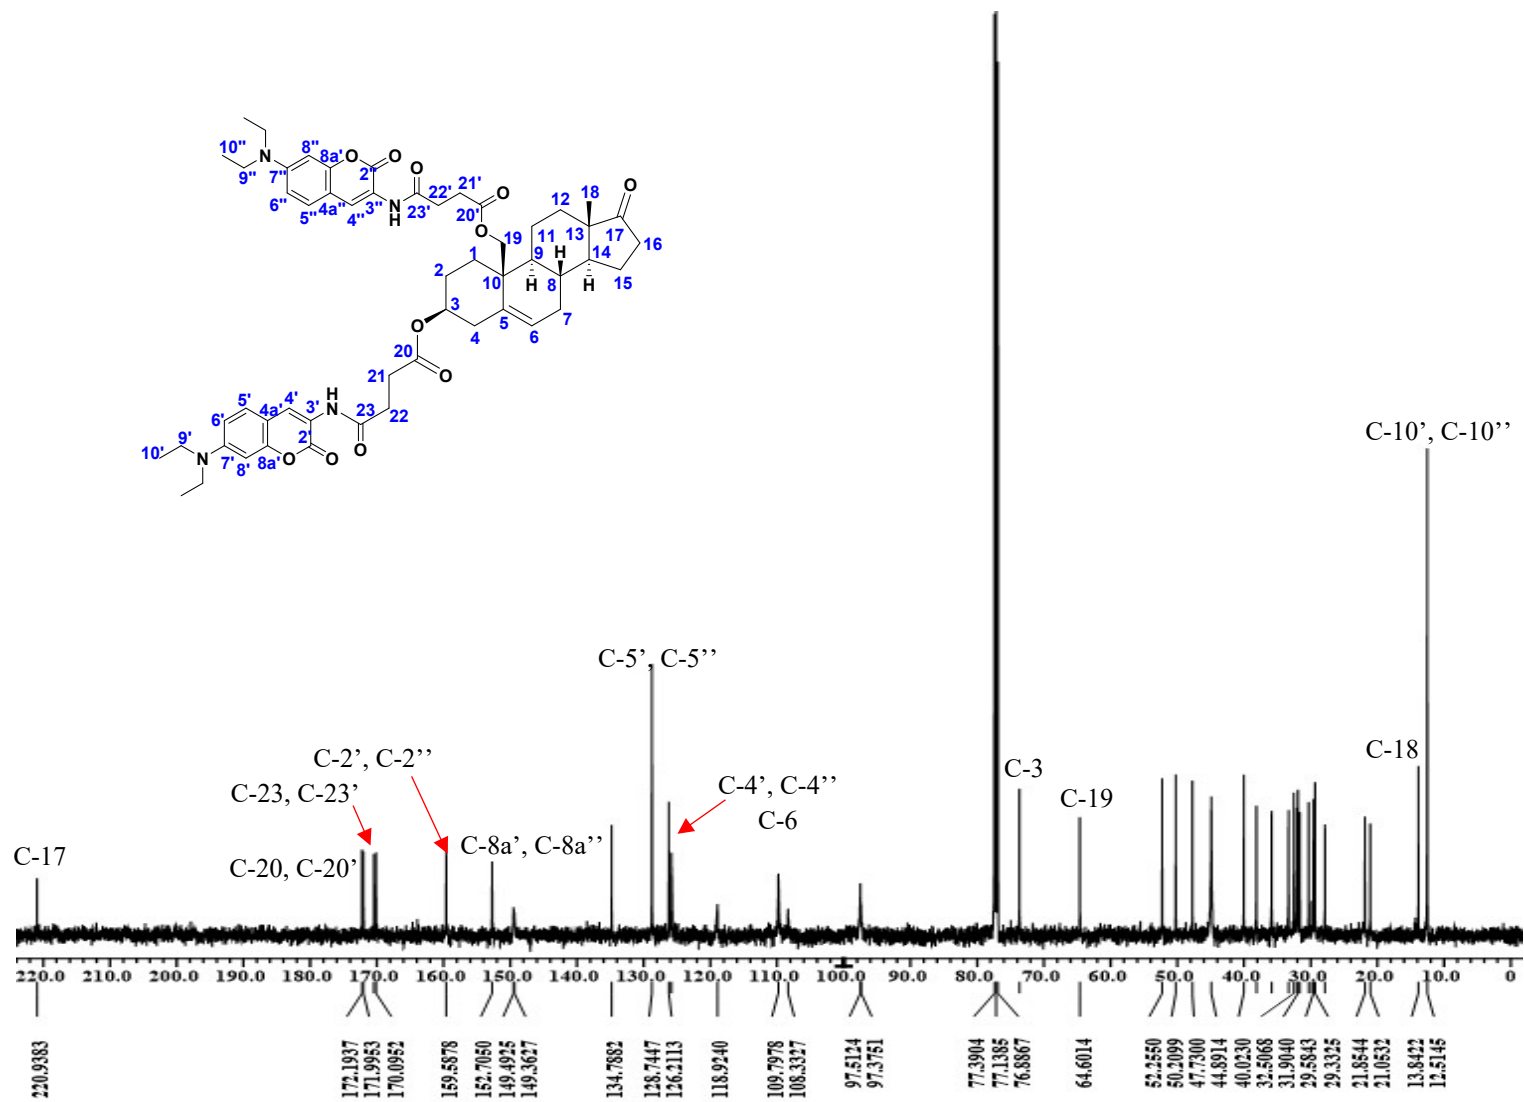

Figure S8.  $^{13}\text{C}$ -NMR spectrum ( $\text{CDCl}_3$ , 125.76 MHz) for **3b**.

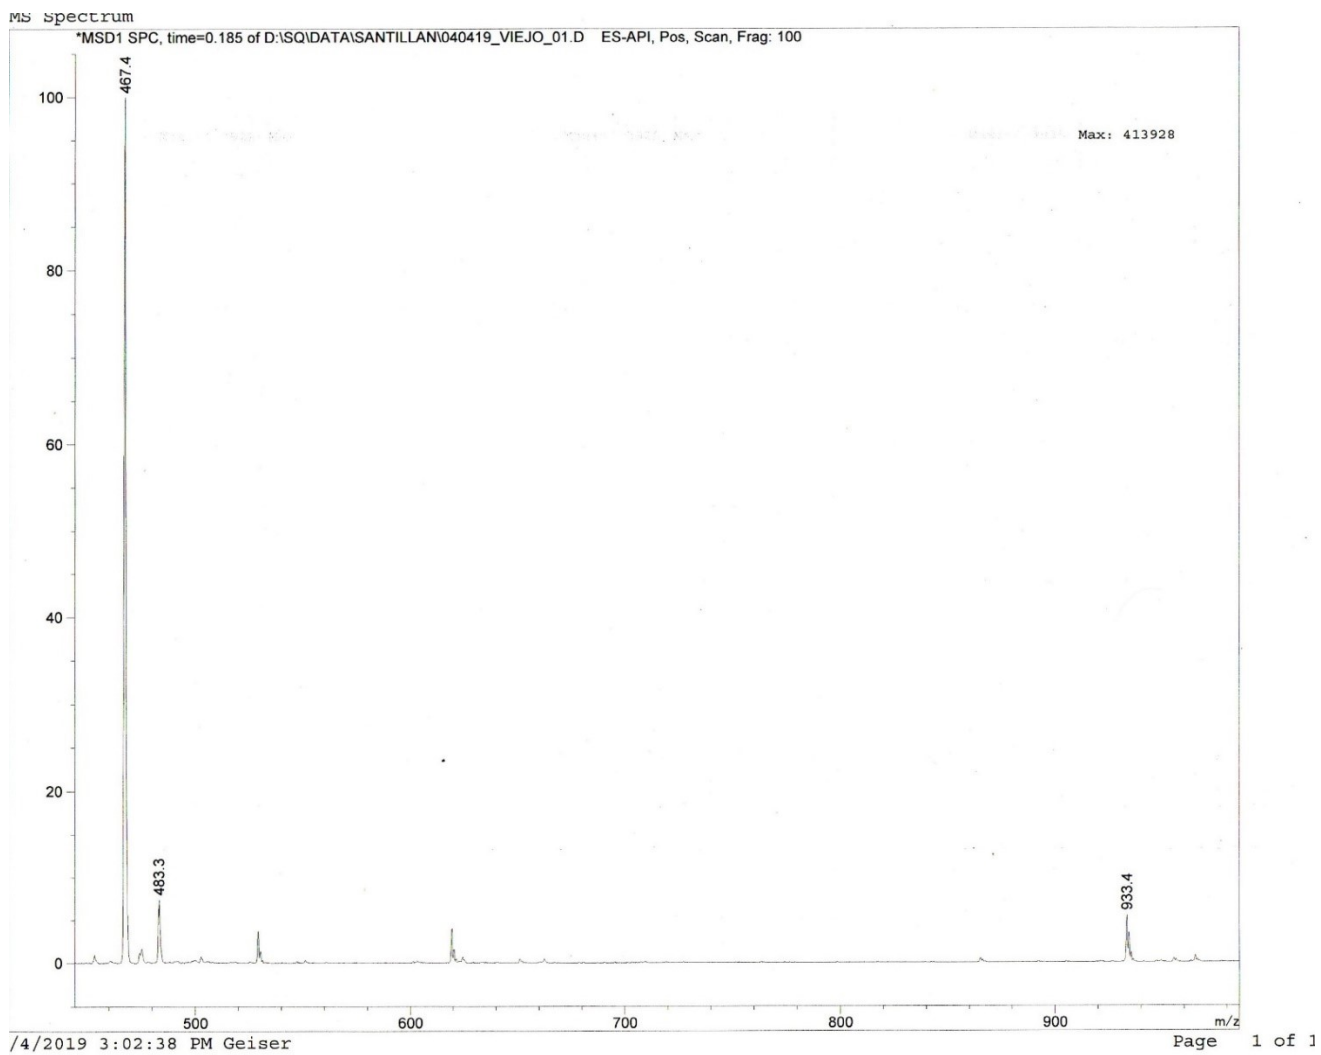

Figure S9. MS (ESI) spectrum for **3b**.

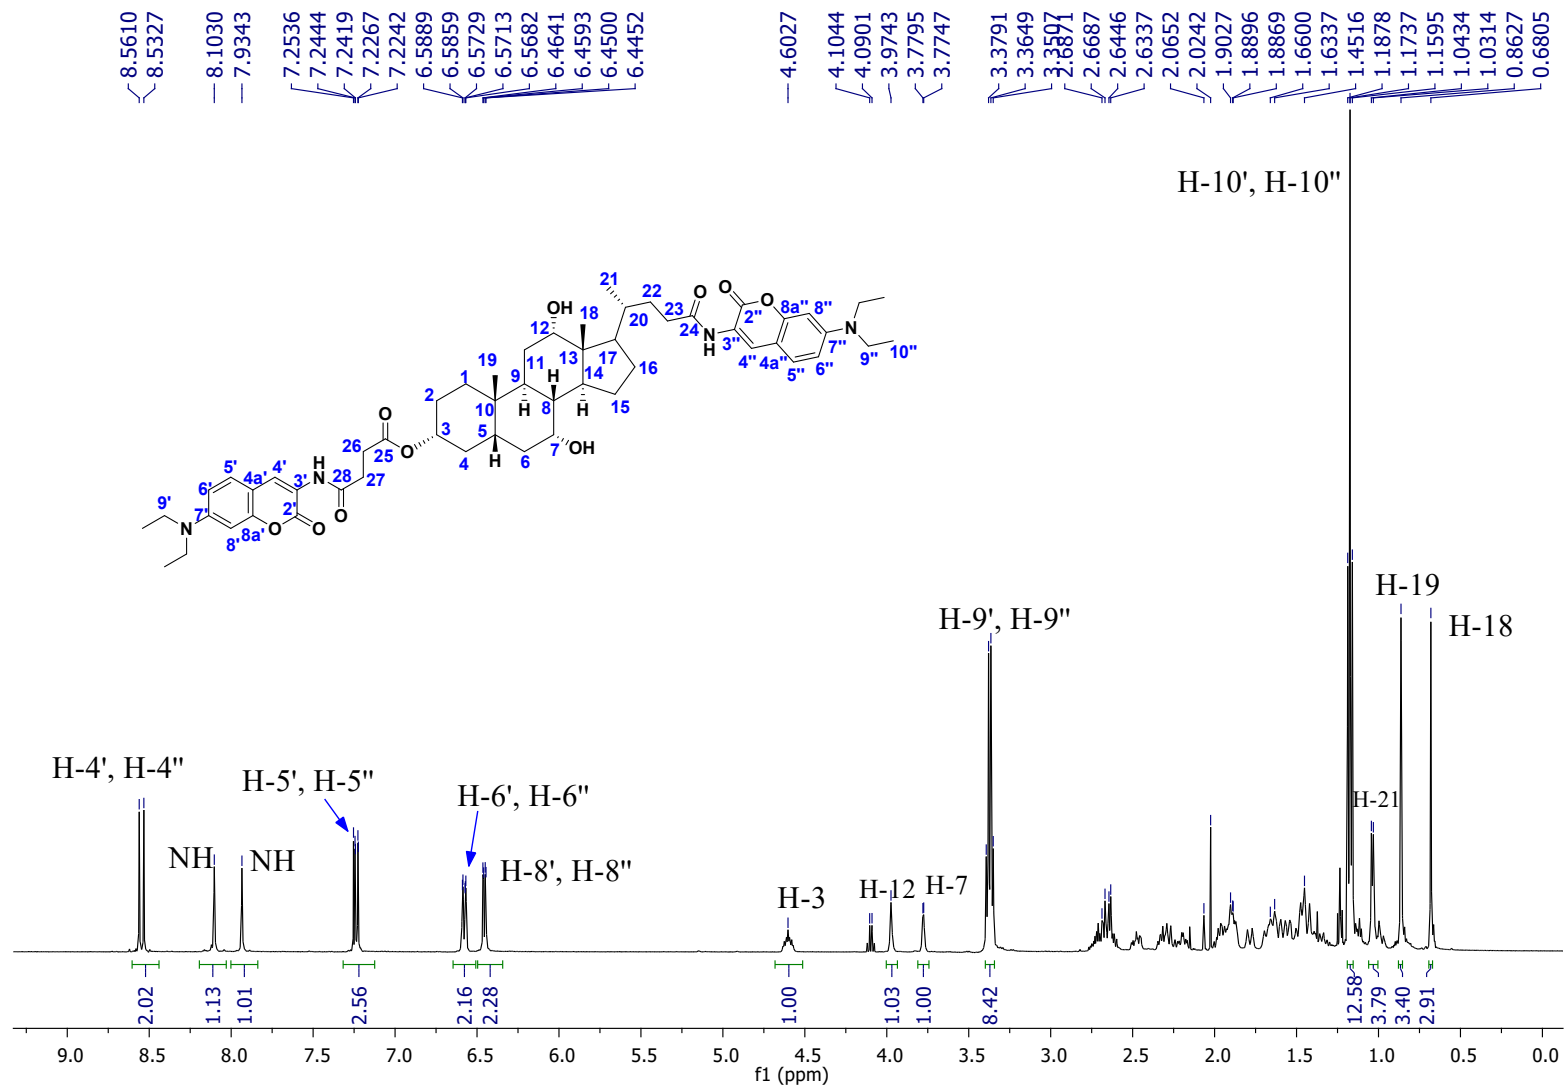

Figure S10. <sup>1</sup>H-NMR spectrum (CDCl<sub>3</sub>, 500 MHz) for 4b.

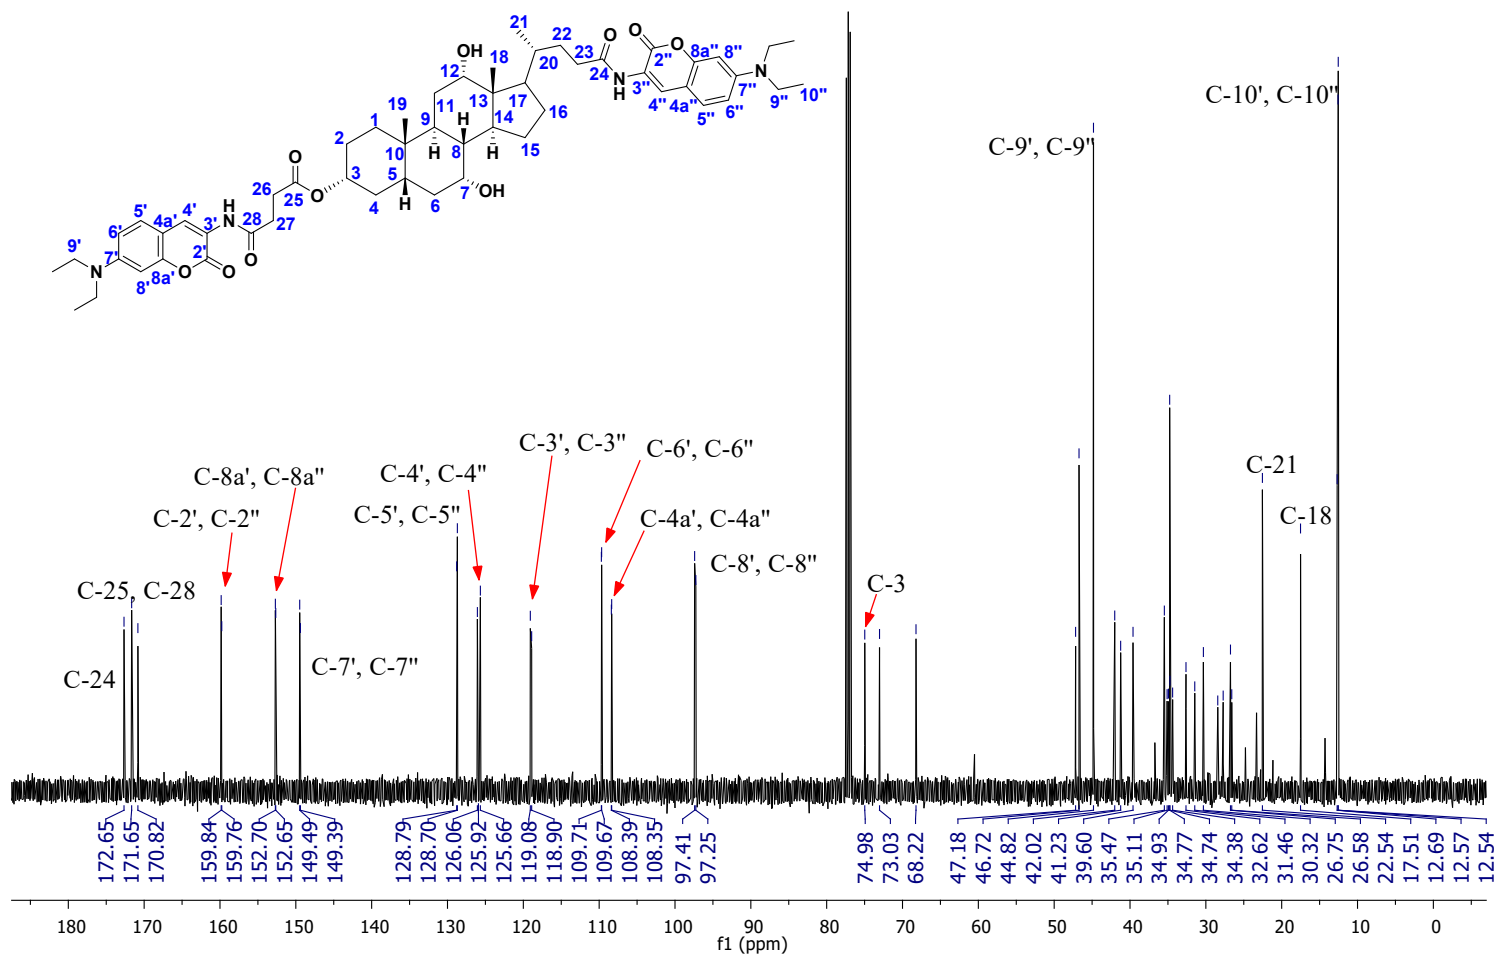

Figure S11.  $^{13}\text{C}$ -NMR spectrum ( $\text{CDCl}_3$ , 125.76 MHz) for **4b**.

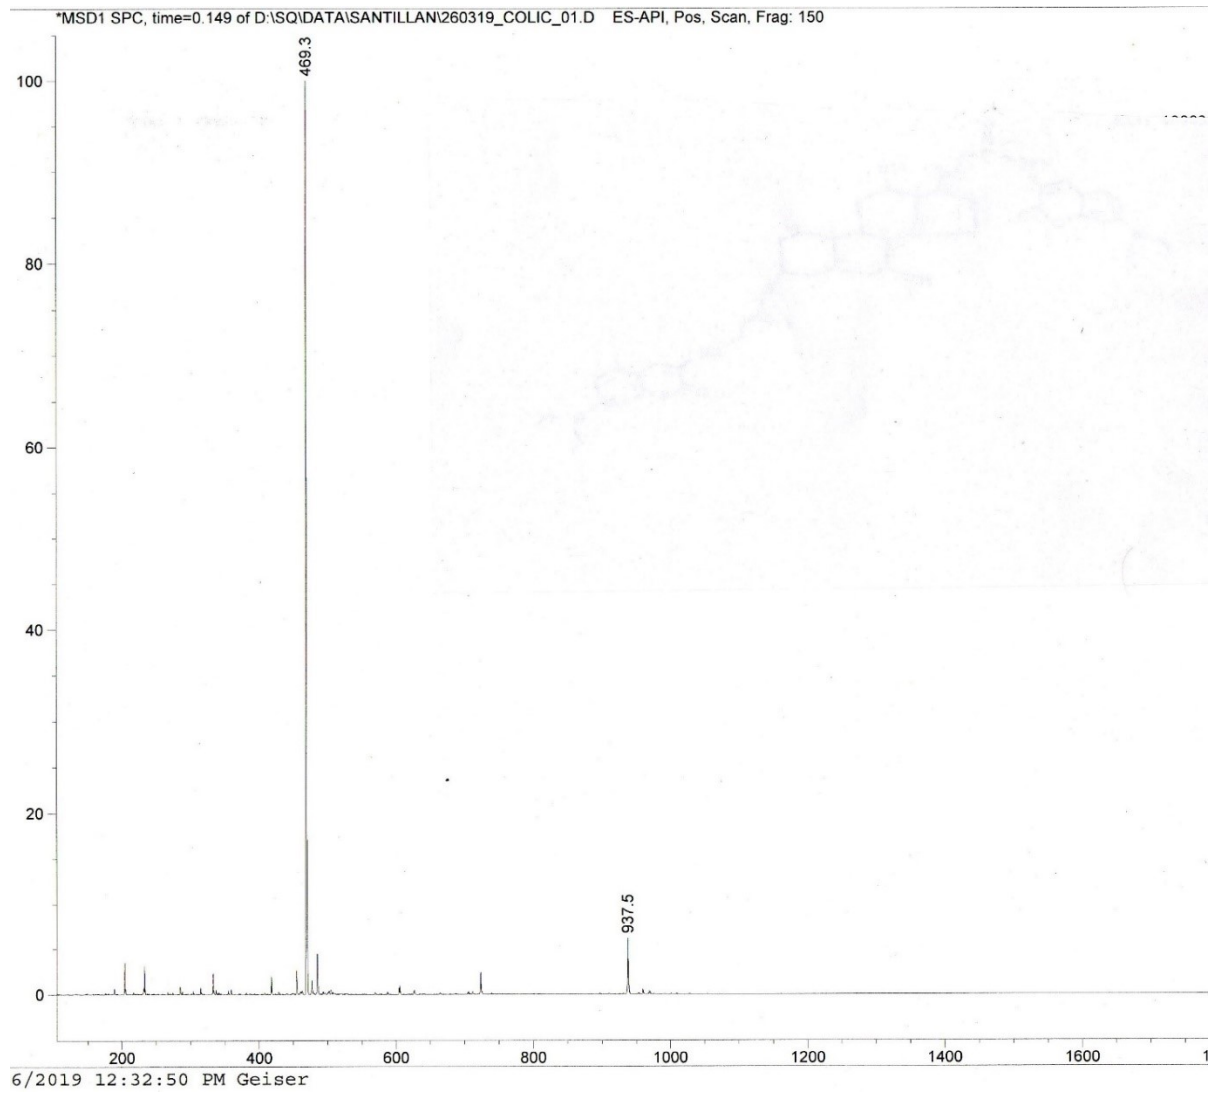

**Figure S12.** MS (ESI) spectrum for **4b**.

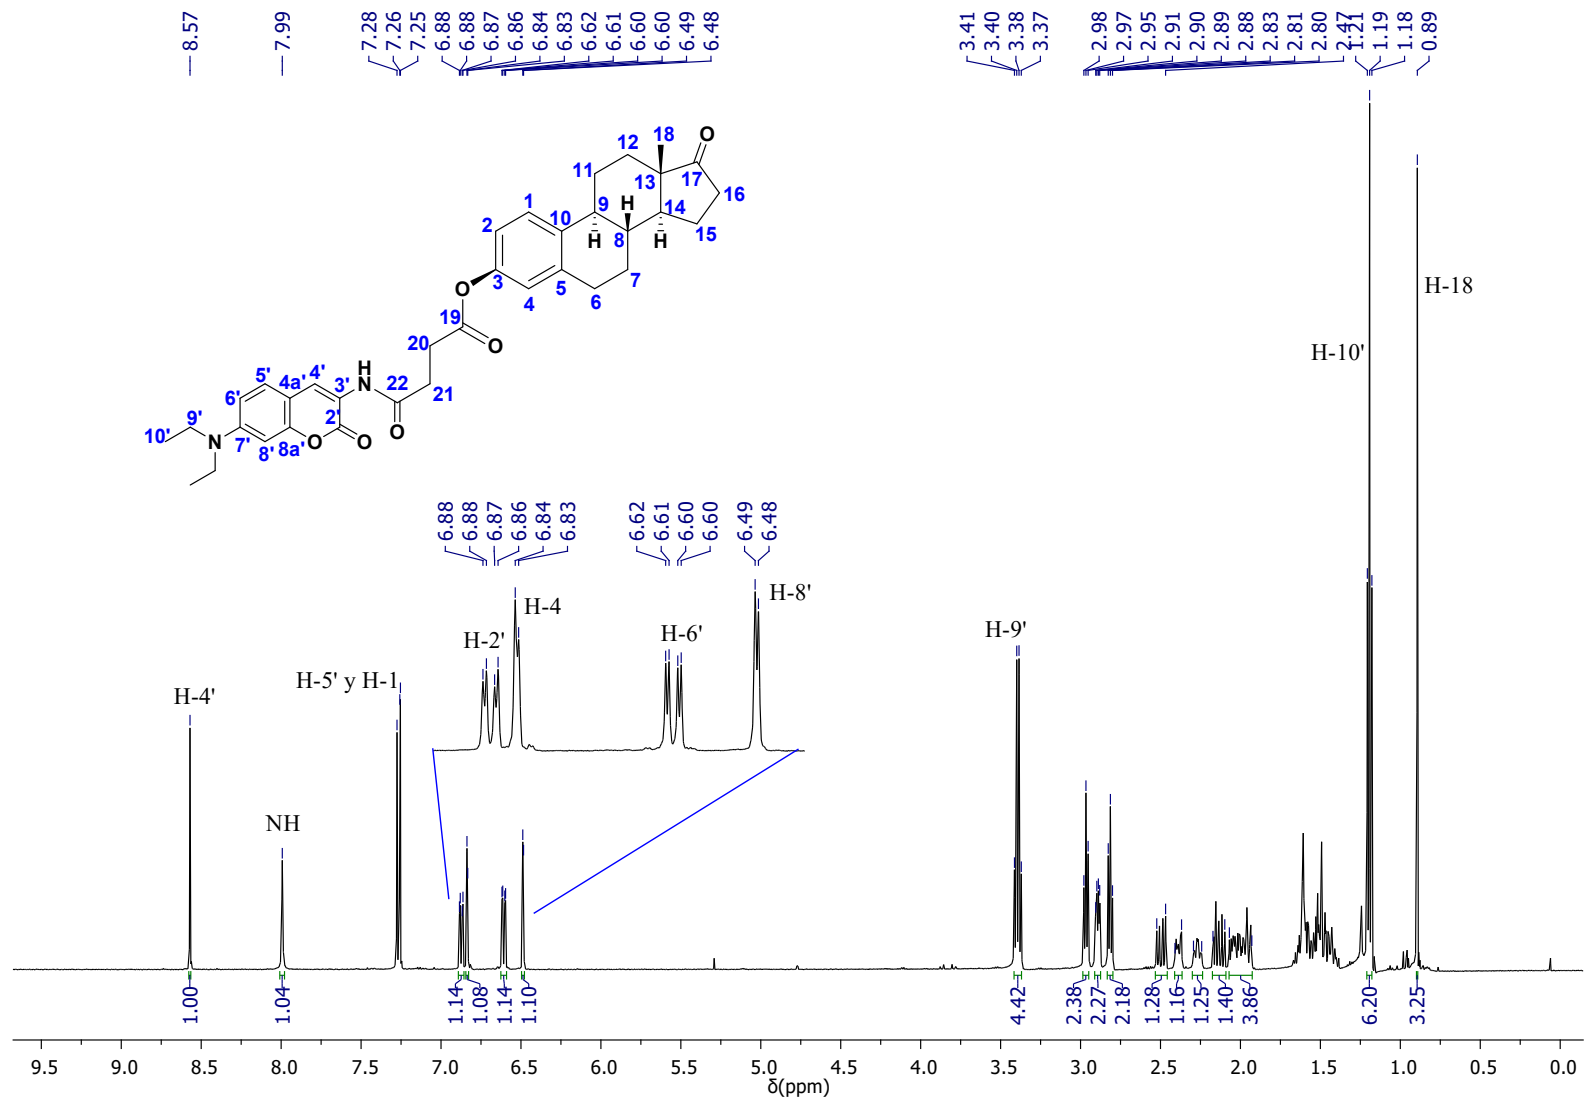

**Figure S13.**  $^1\text{H-NMR}$  spectrum ( $\text{CDCl}_3$ , 500 MHz) for **5b**.

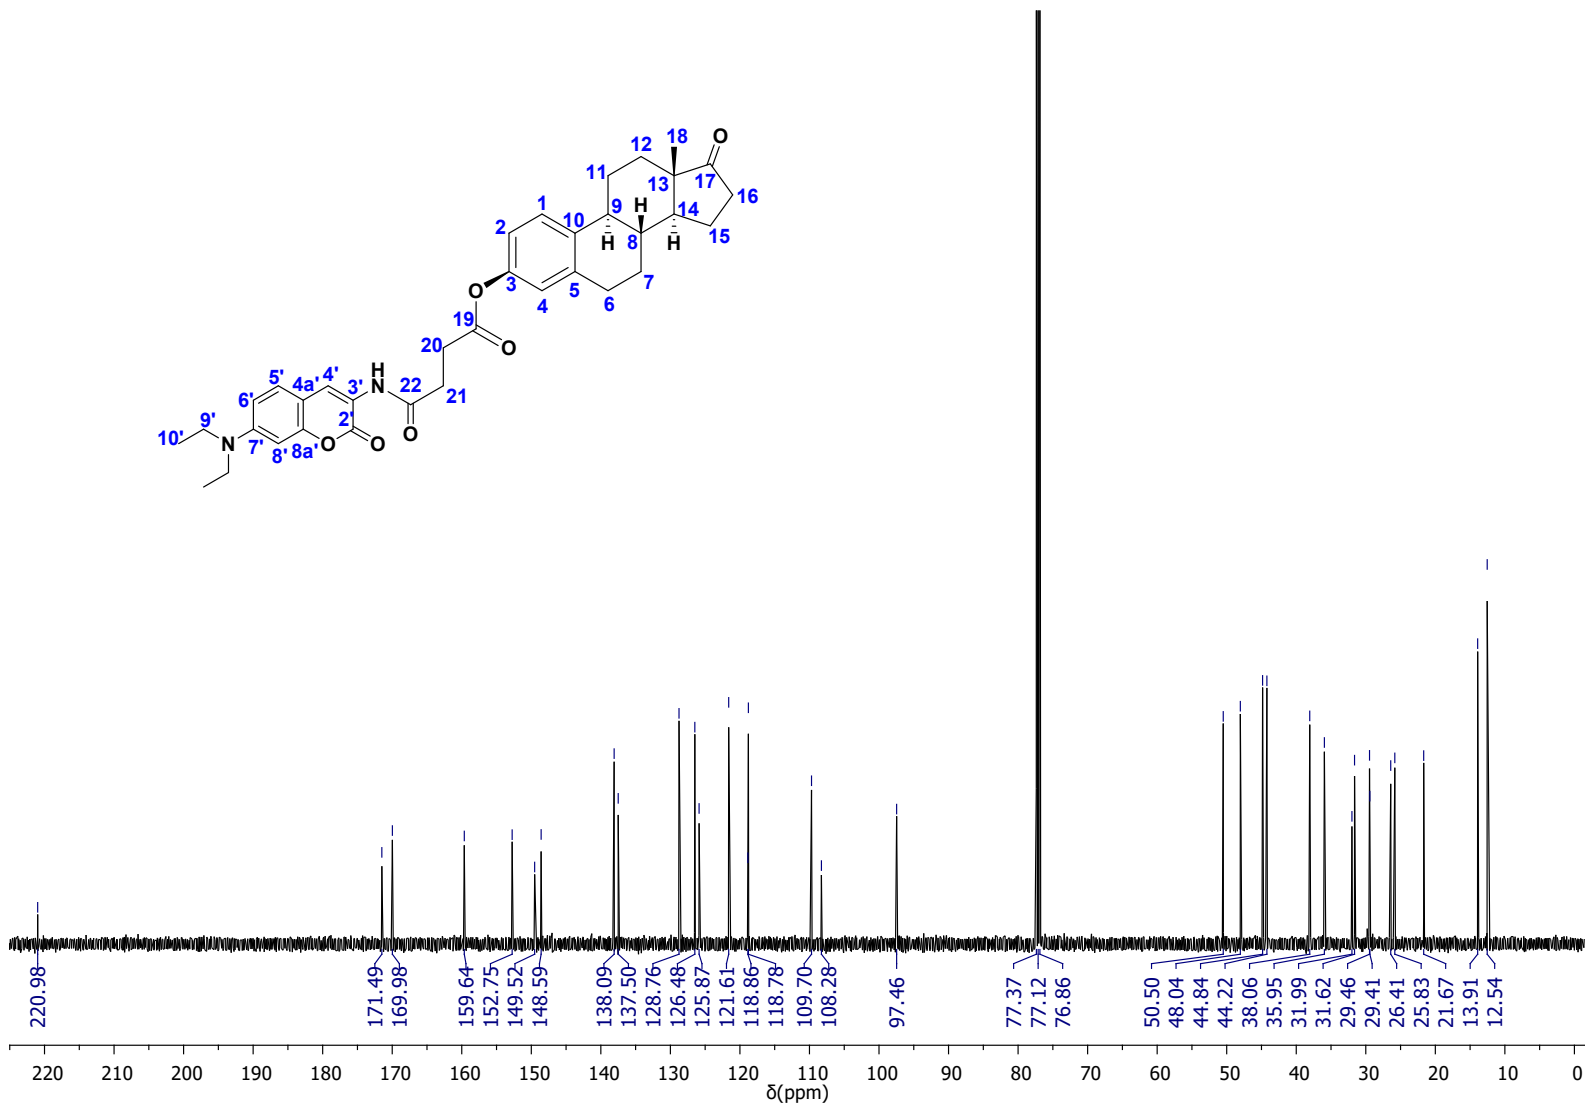

Figure S14. <sup>13</sup>C-NMR spectrum (CDCl<sub>3</sub>, 125.76 MHz) for **5b**.





Print of window 80: MS Spectrum

MS Spectrum

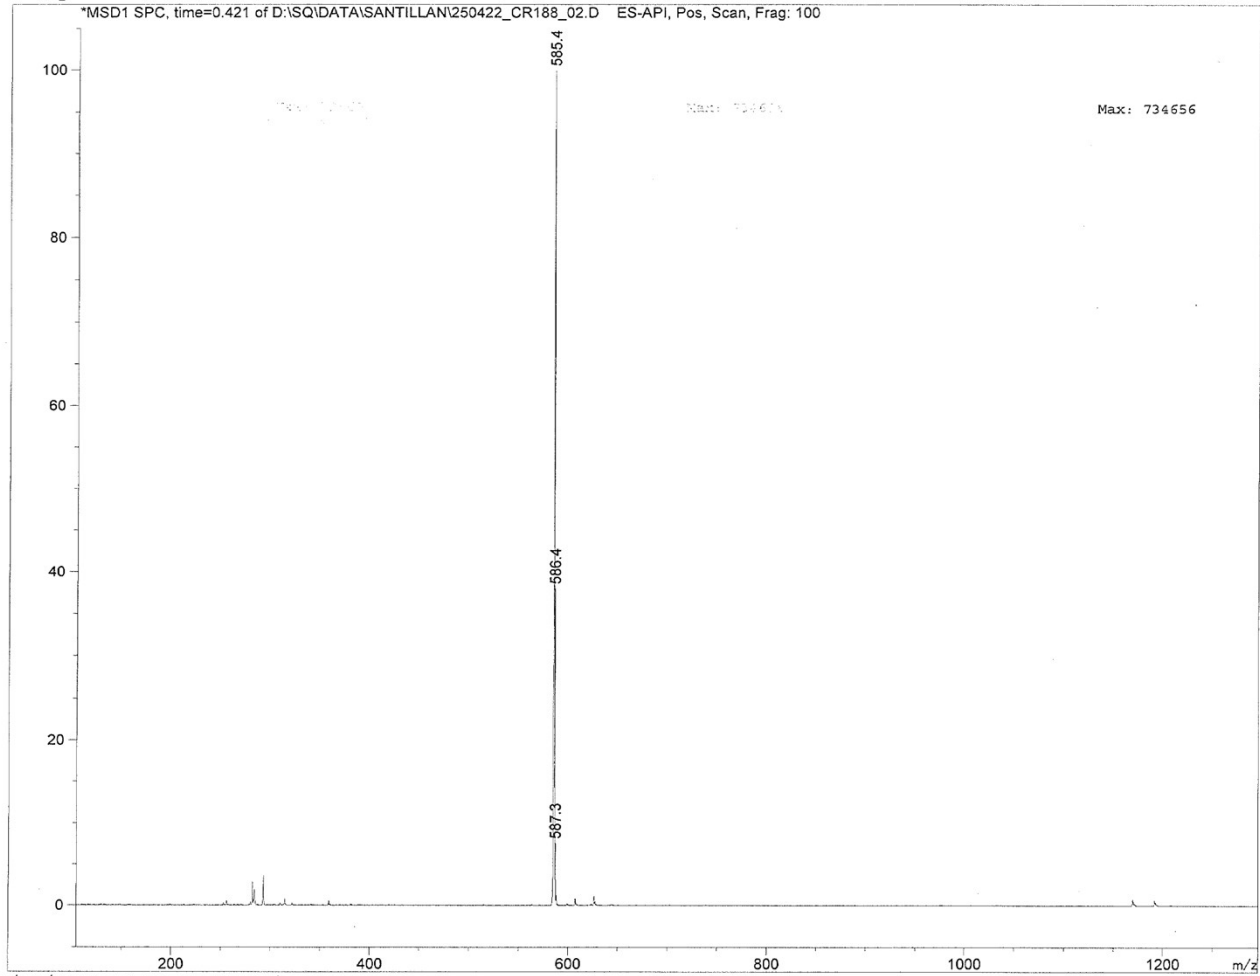

Figure S15. MS (ESI) spectrum for 5b.

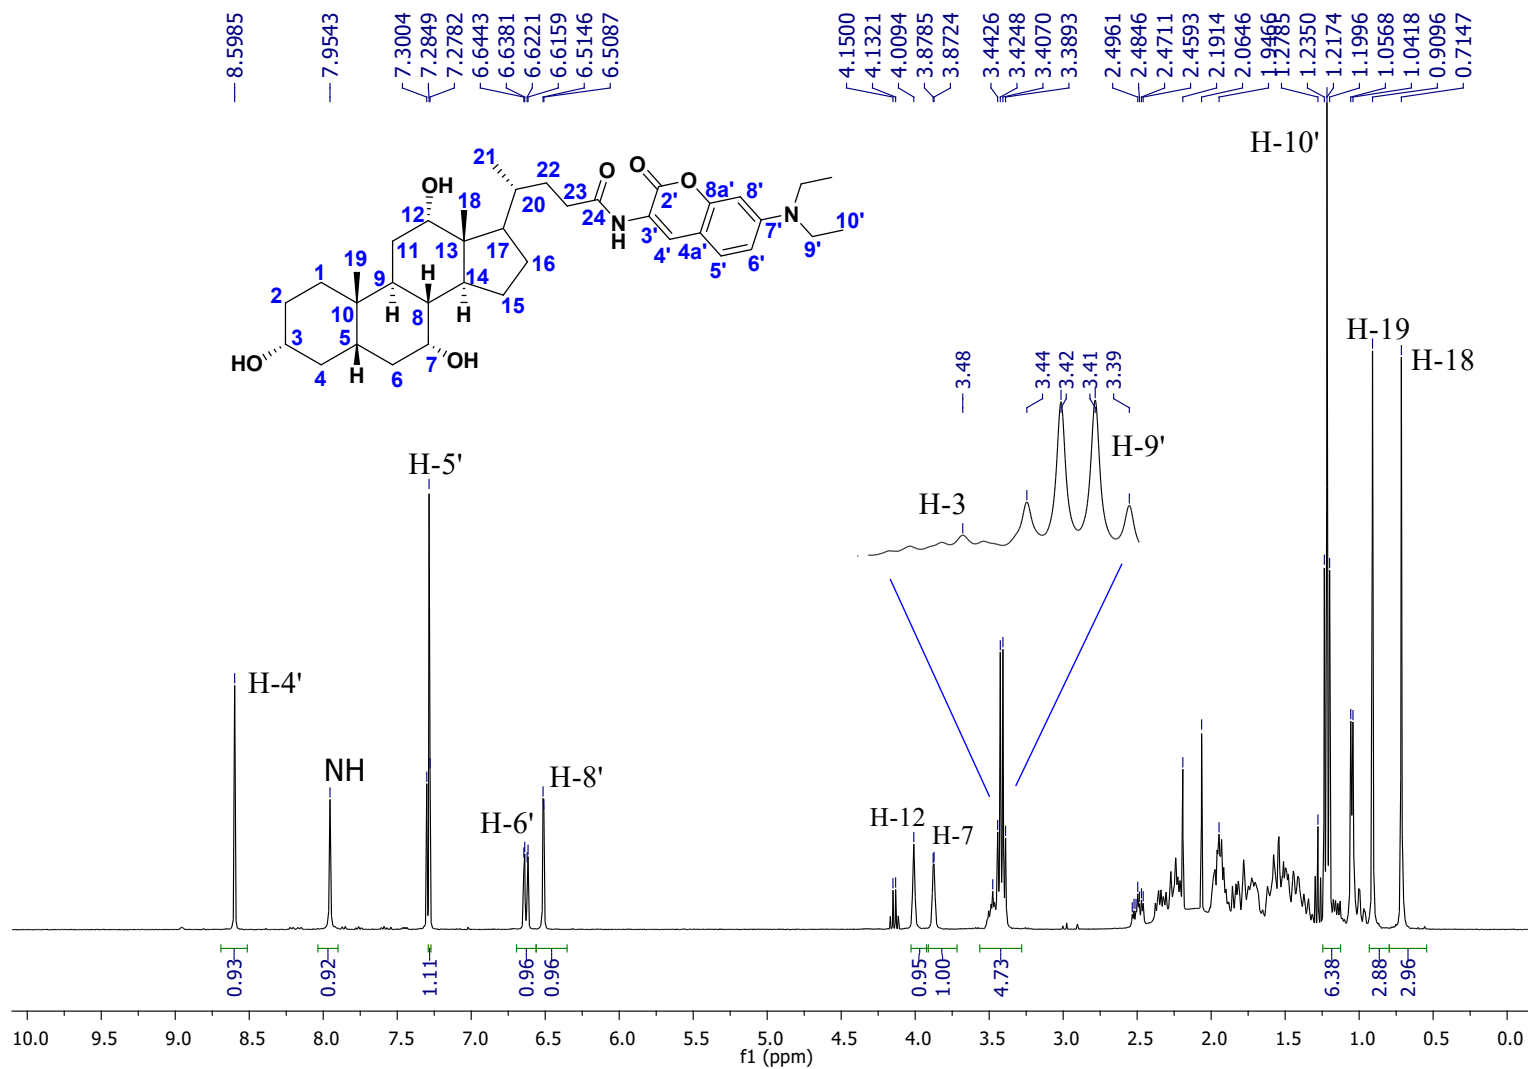

Figure S16. <sup>1</sup>H-NMR spectrum (CDCl<sub>3</sub>, 400 MHz) for 6a.

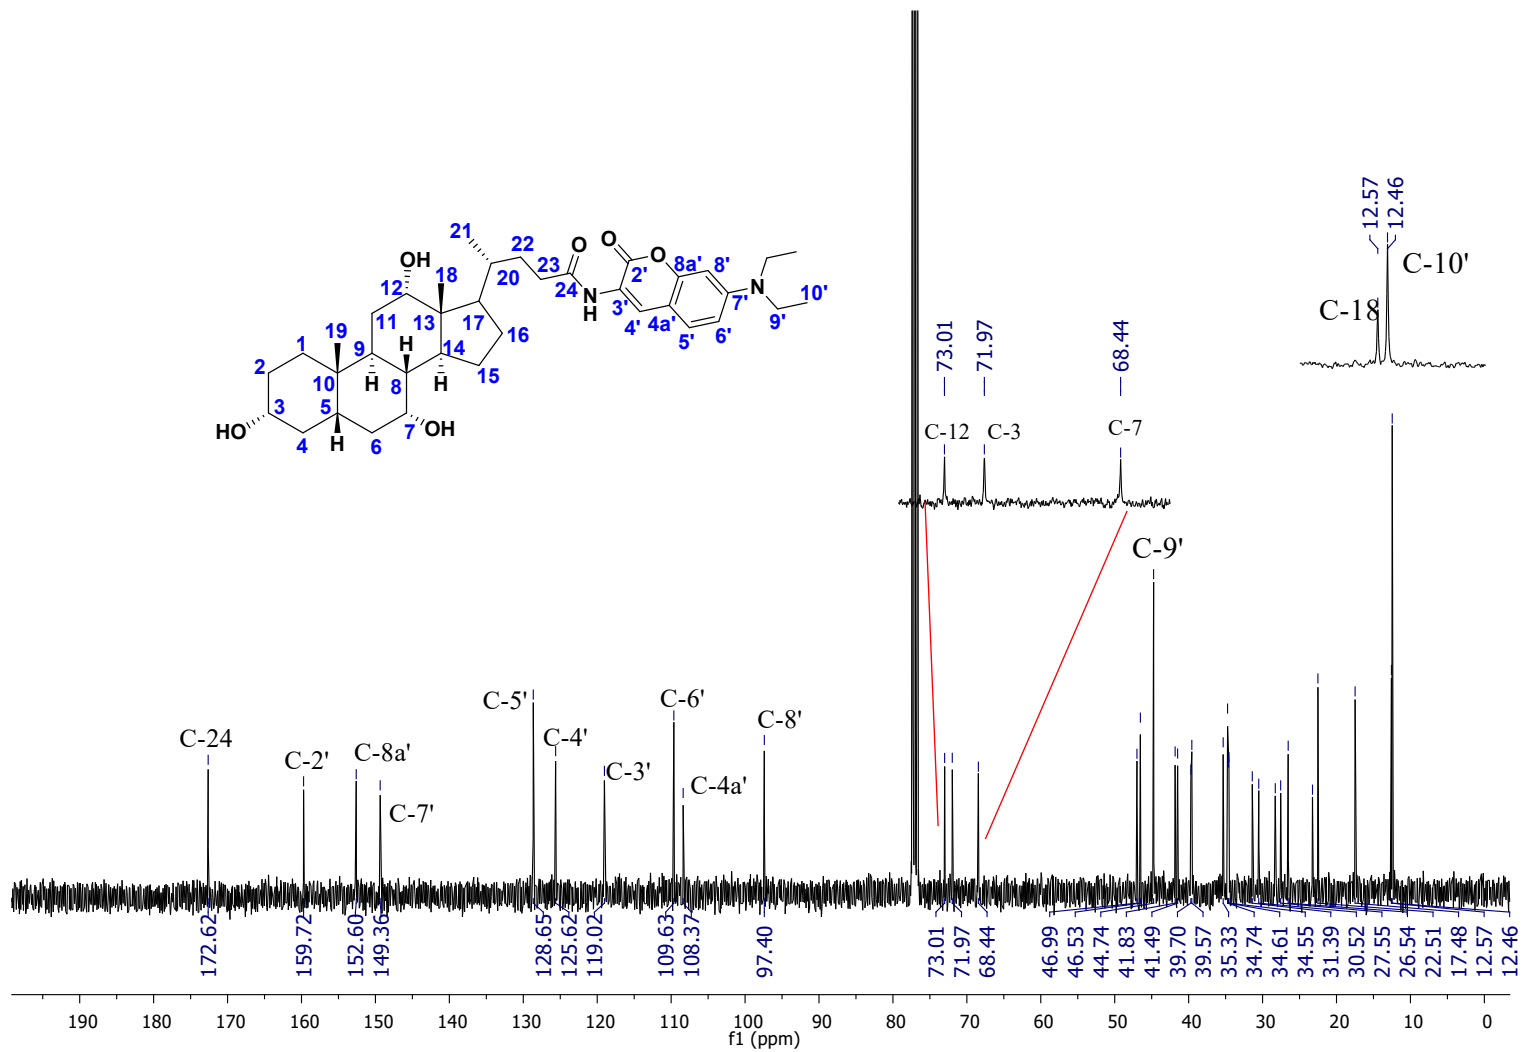

Figure S17.  $^{13}\text{C}$ -NMR spectrum ( $\text{CDCl}_3$ , 100.5 MHz) for 6a.

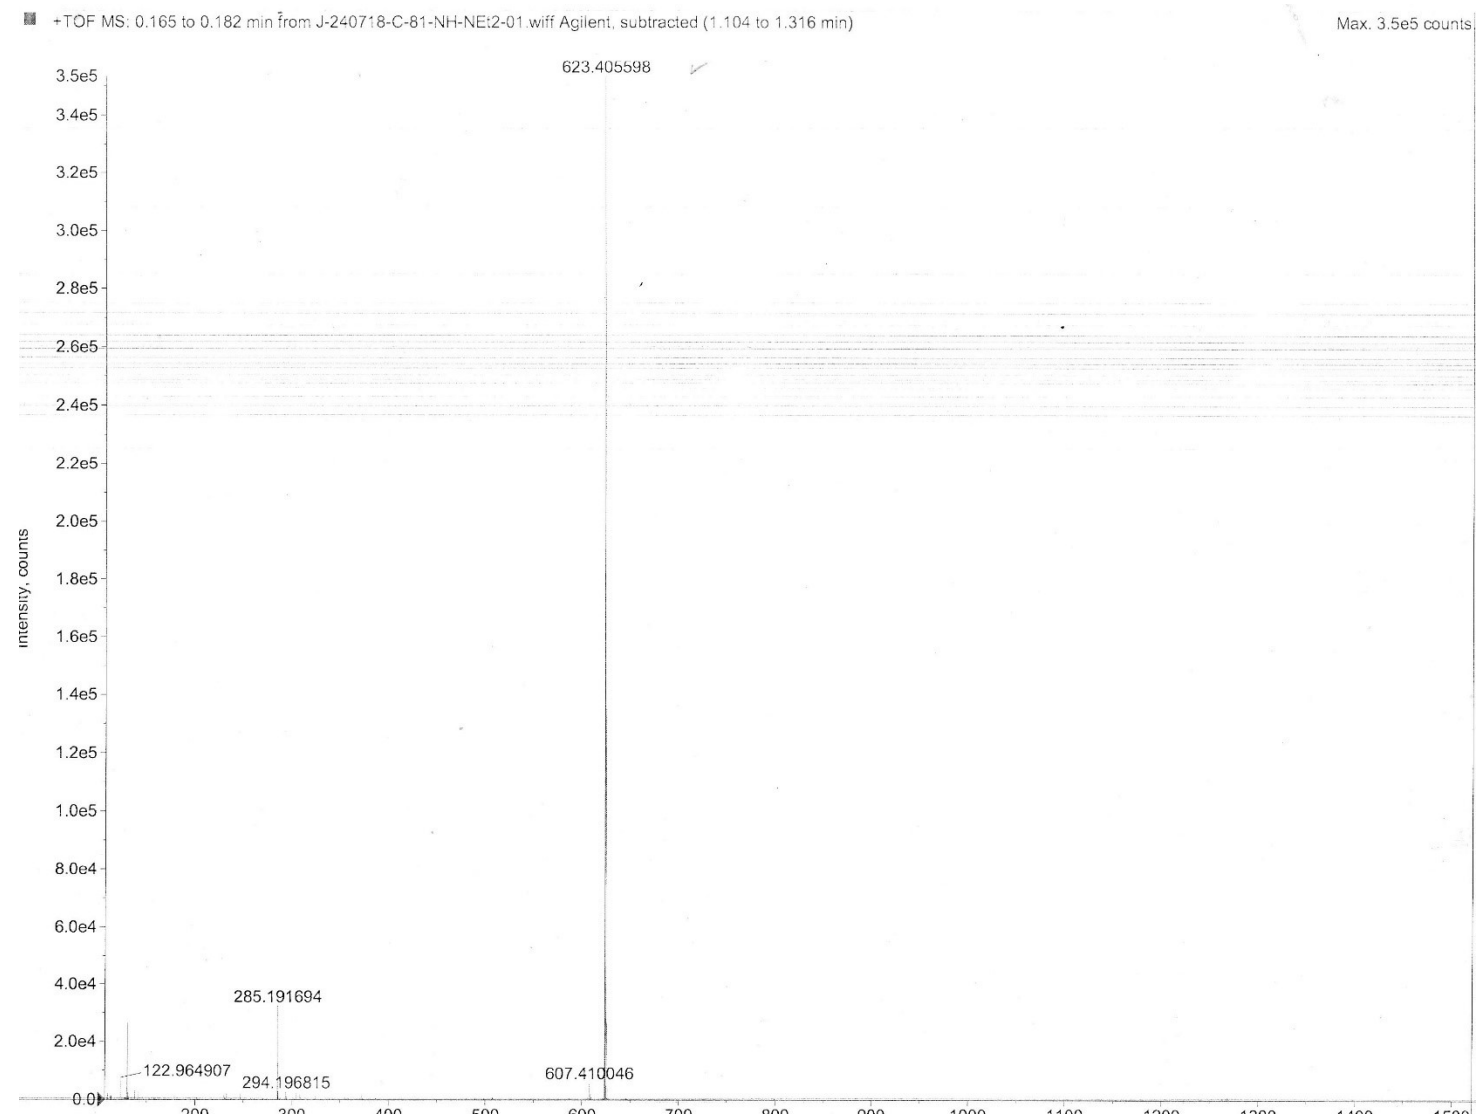

Figure S18. HRMS (ESI-TOF<sup>+</sup>) spectrum for 6a.

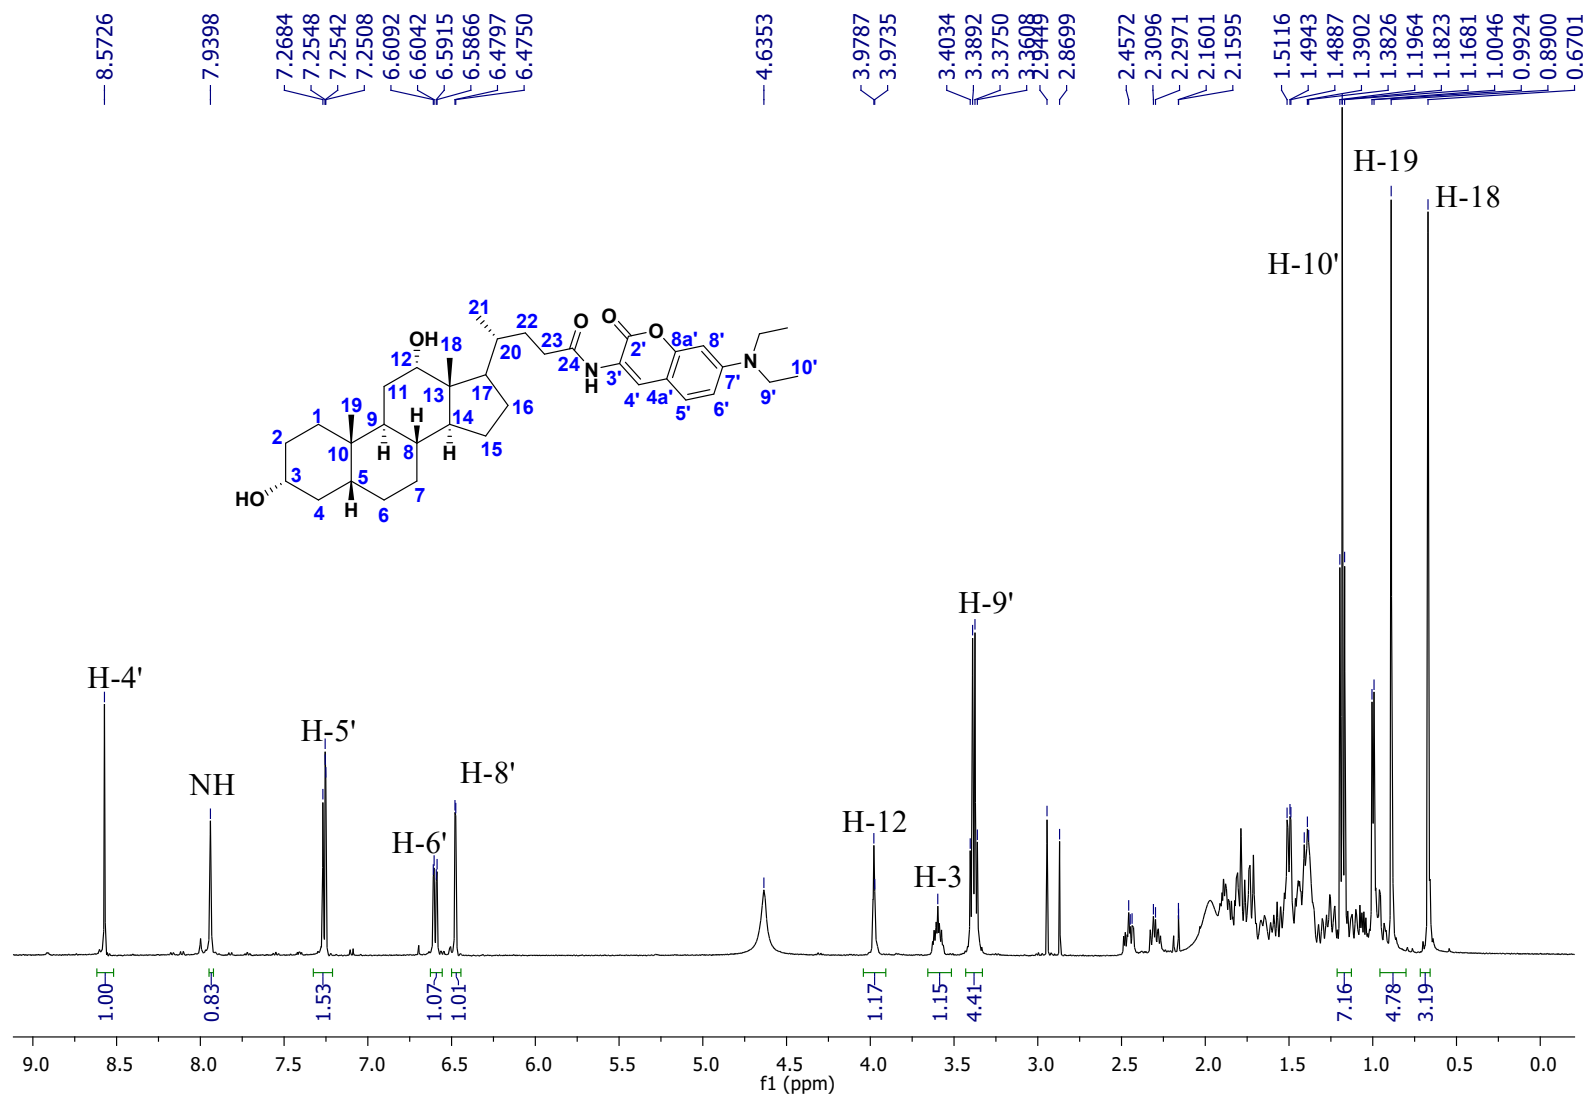

Figure S19.  $^1\text{H-NMR}$  spectrum ( $\text{CDCl}_3$ , 500 MHz) for **7a**.

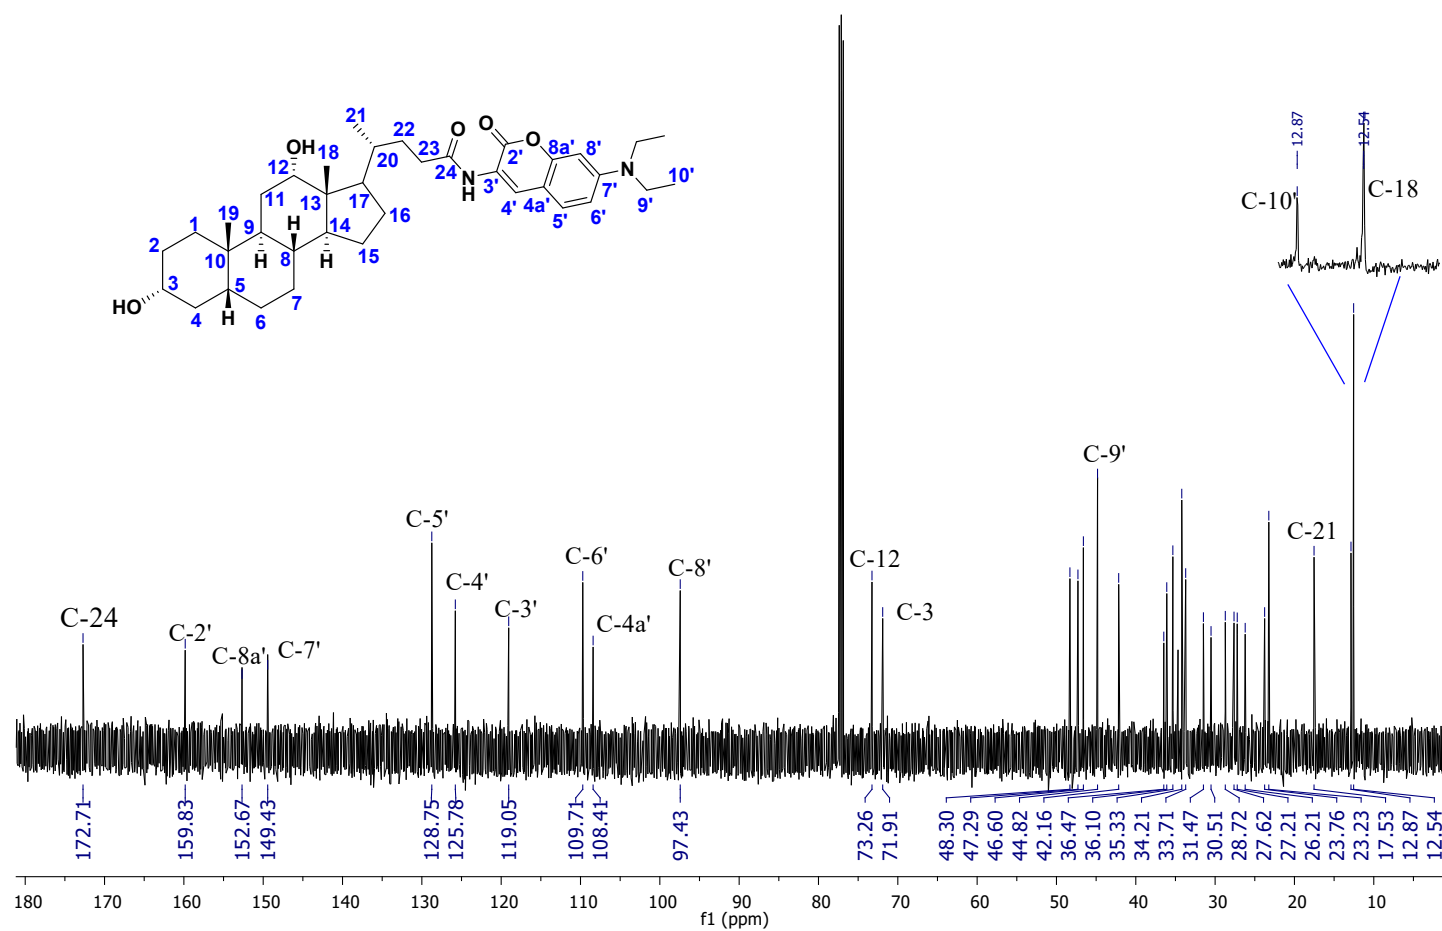

Figure S20.  $^{13}\text{C-NMR}$  spectrum ( $\text{CDCl}_3$ , 125.76 MHz) for **7a**.

window 80: MS Spectrum

MS Spectrum

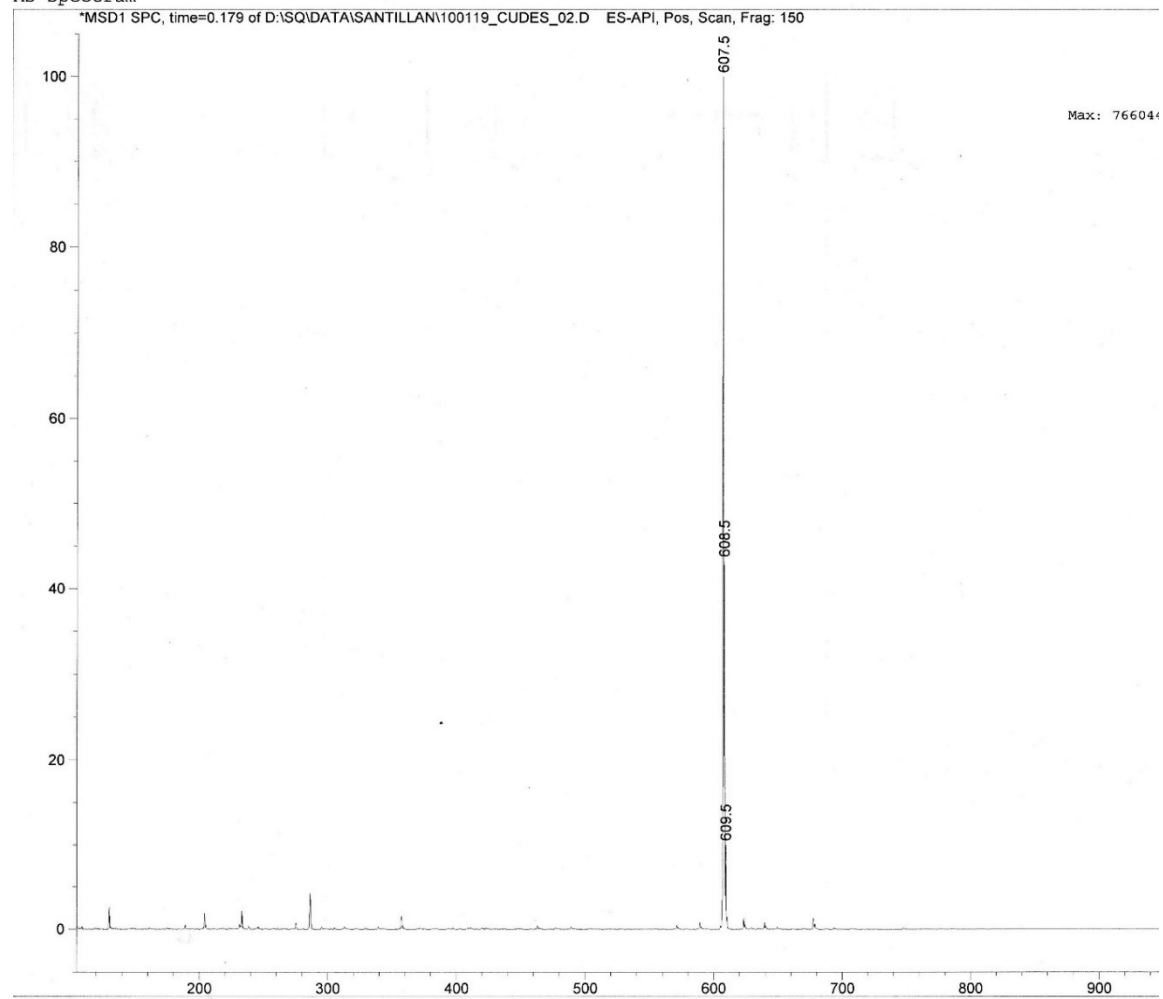

**Figure S21.** MS (ESI) spectrum for **7a**.



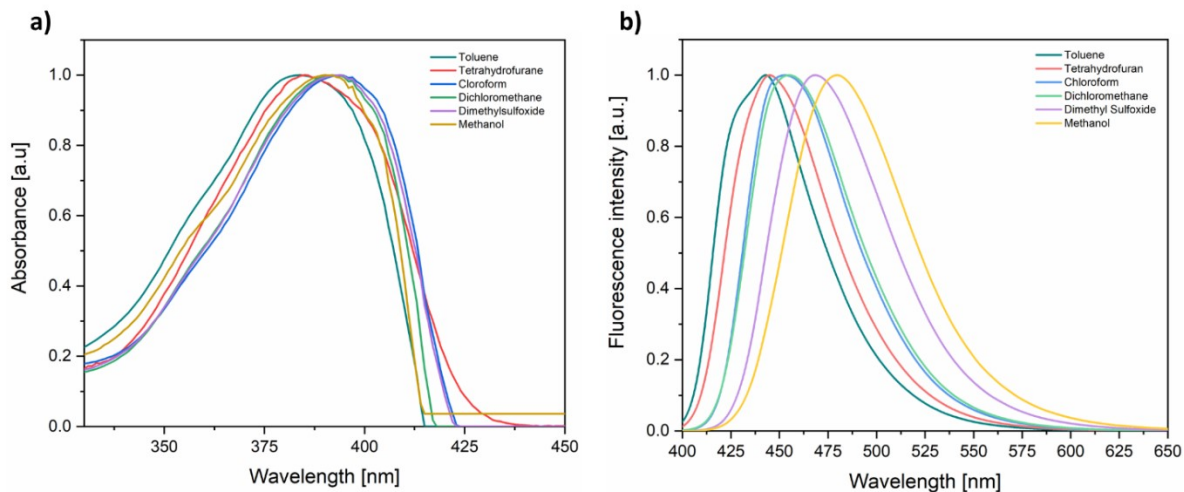

**Figure S22.** a) Absorption and b) Emission spectrum of compound **2b** in different solvents.

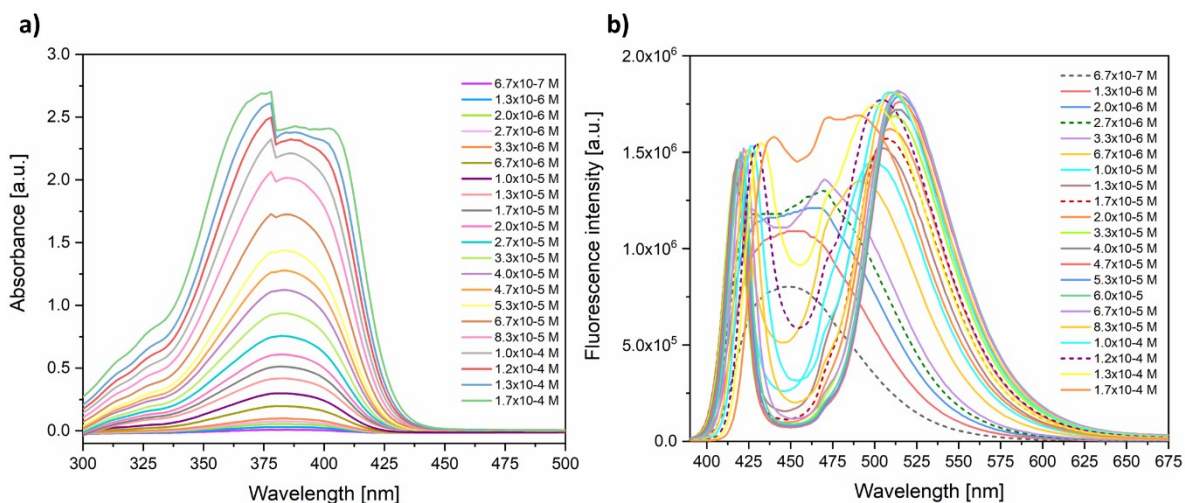

**Figure S23.** a) Absorption and b) fluorescence ( $\lambda_{\text{exc}} = 390$  nm) spectra for varied concentration of **3b** in dioxane.



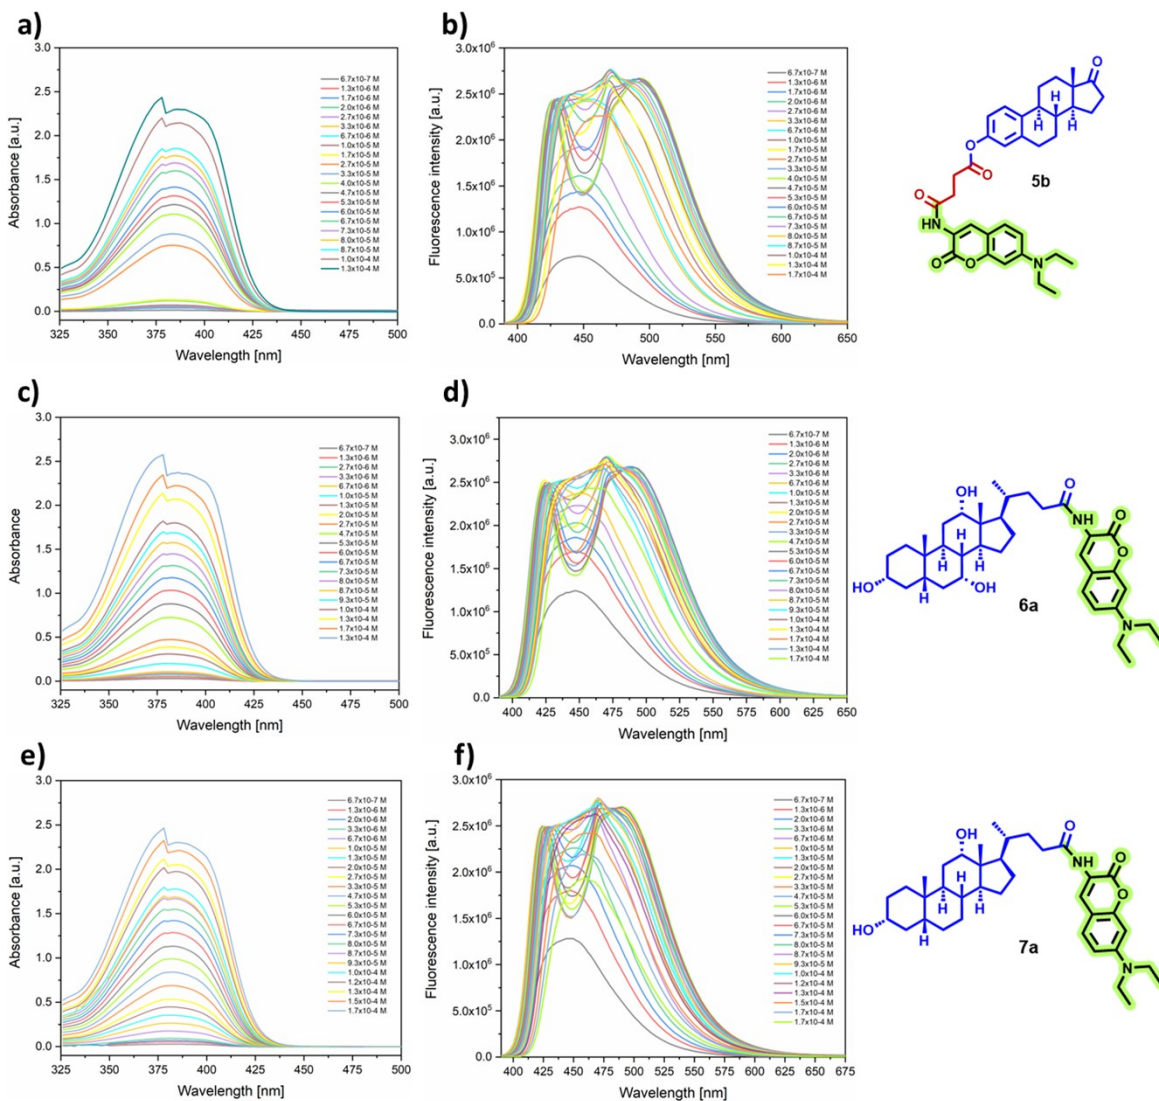

**Figure S25.** Absorption and fluorescence spectra of the concentration study of compounds g) and h) **5b**, i) and j) **6a**, k) and l) **7a**, in 1,4-dioxane. For these experiments, a solution with a concentration of 10 mmolar of each compound was used, and the excitation wavelength was 380nm.

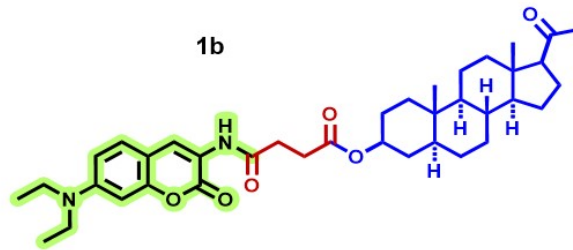

**Low concentration  $1.7 \times 10^{-6}$  M**

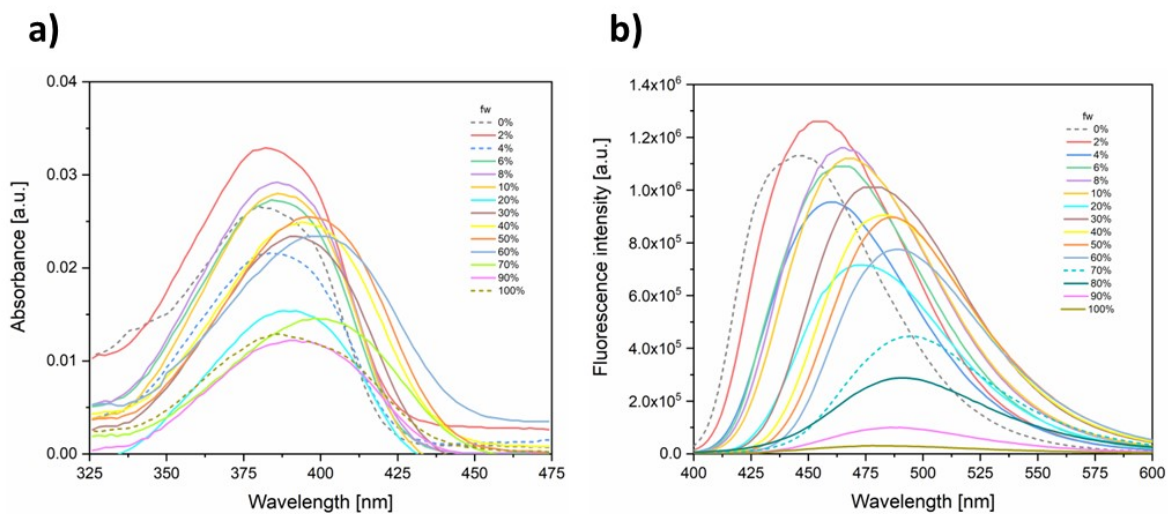

**High concentration  $2.7 \times 10^{-5}$  M**

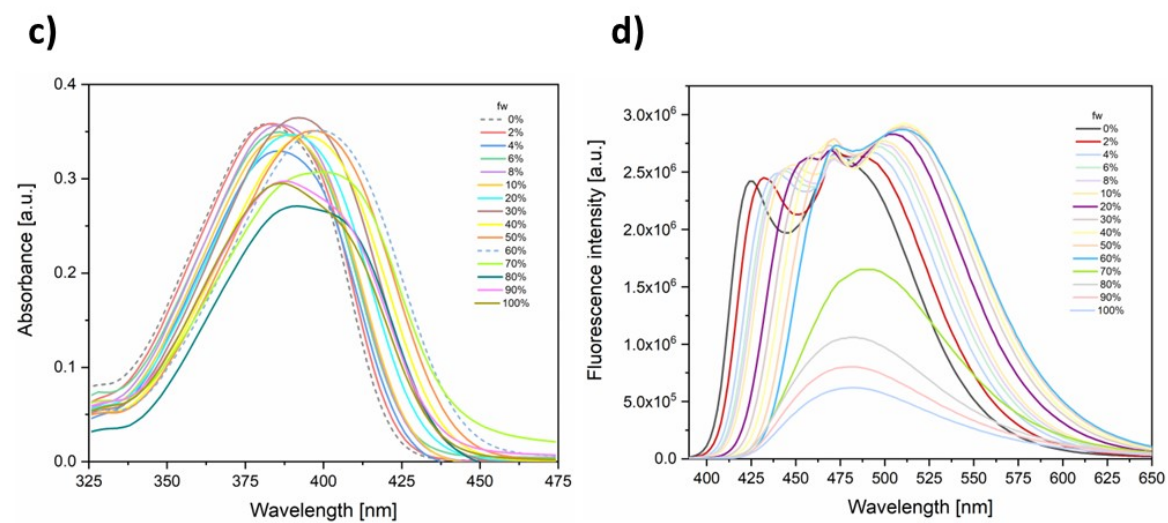

**Figure S26.** Absorption a), c) and emission b), d) spectra of 1,4-dioxane:water titration experiments of compound **1b**.



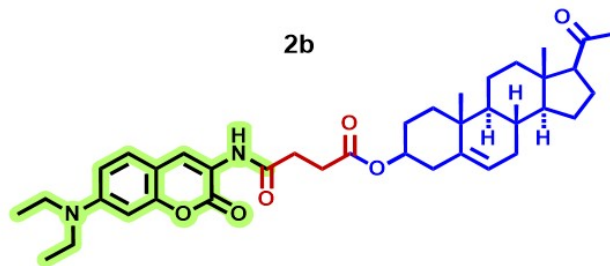

**Low concentration  $3.3 \times 10^{-6}$  M**

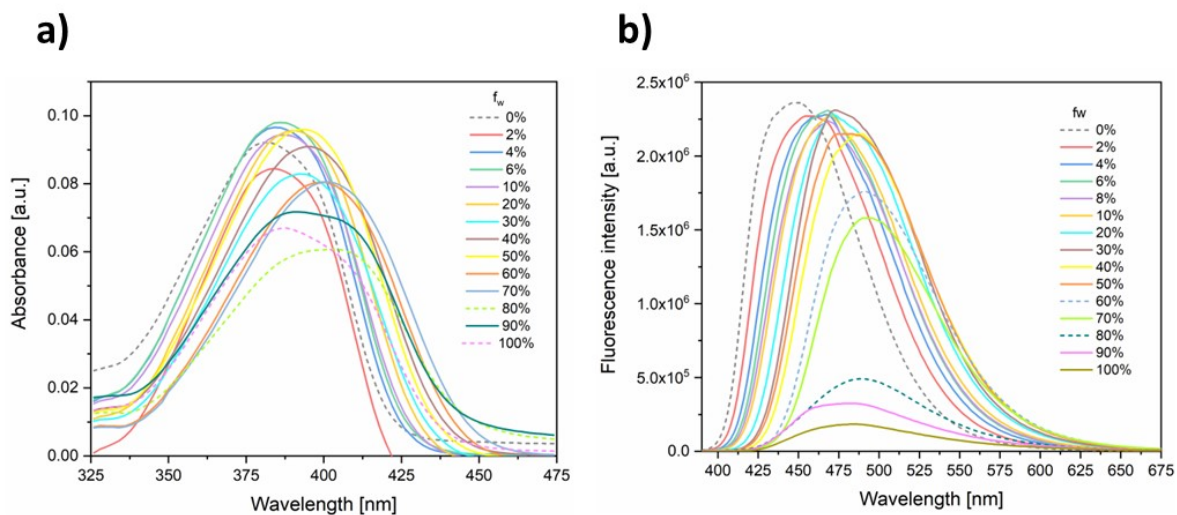

**High concentration  $3.3 \times 10^{-5}$  M**

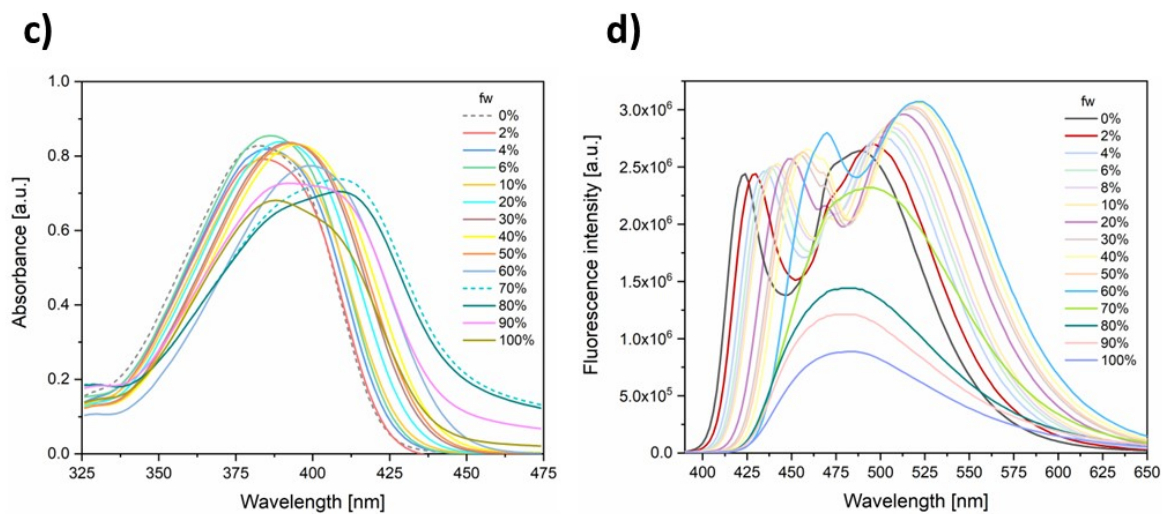

**Figure S27.** Absorption a), c) and emission b), d) spectra of 1,4-dioxane:water titration experiments of compound **2b**.

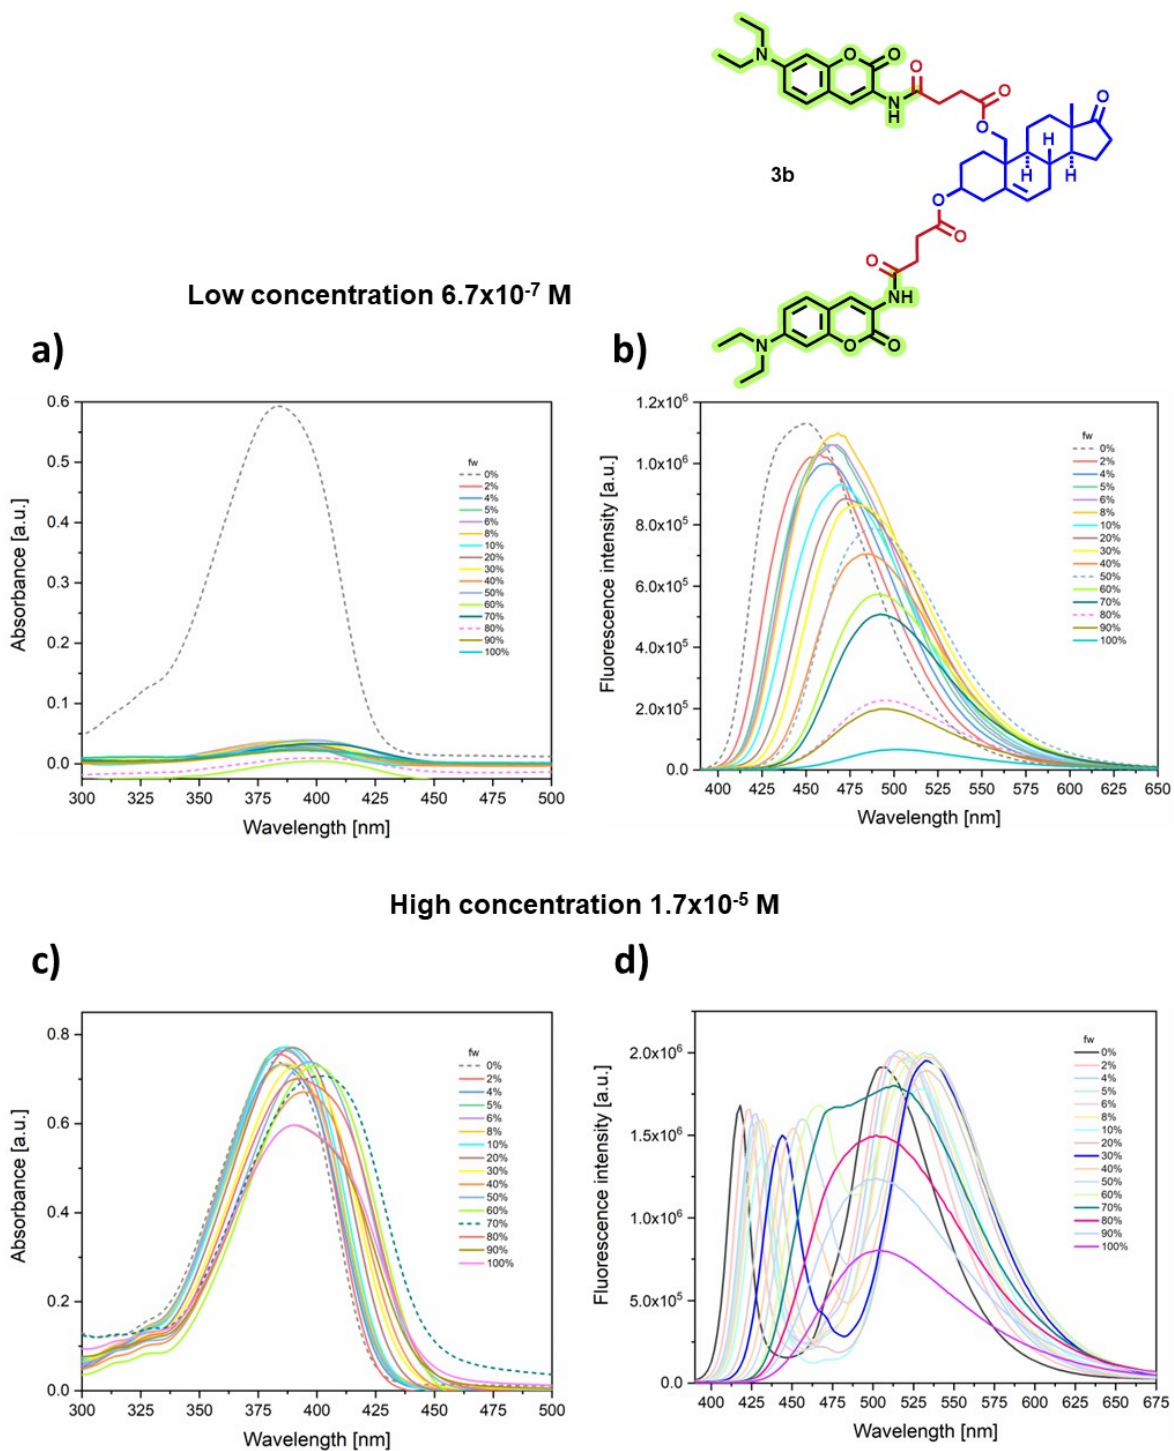

**Figure S28.** Absorption a), c) and emission b), d) spectra of 1,4-dioxane:water titration experiments of compound **3b**.

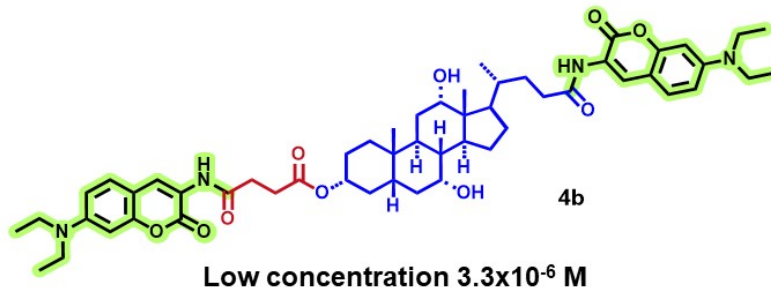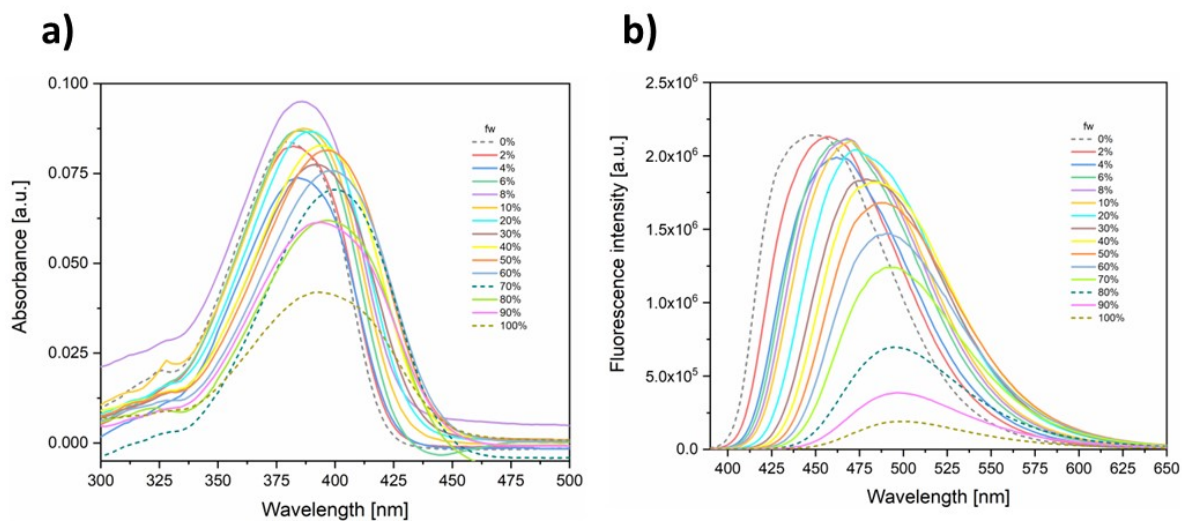

High concentration  $3.3 \times 10^{-5}$  M

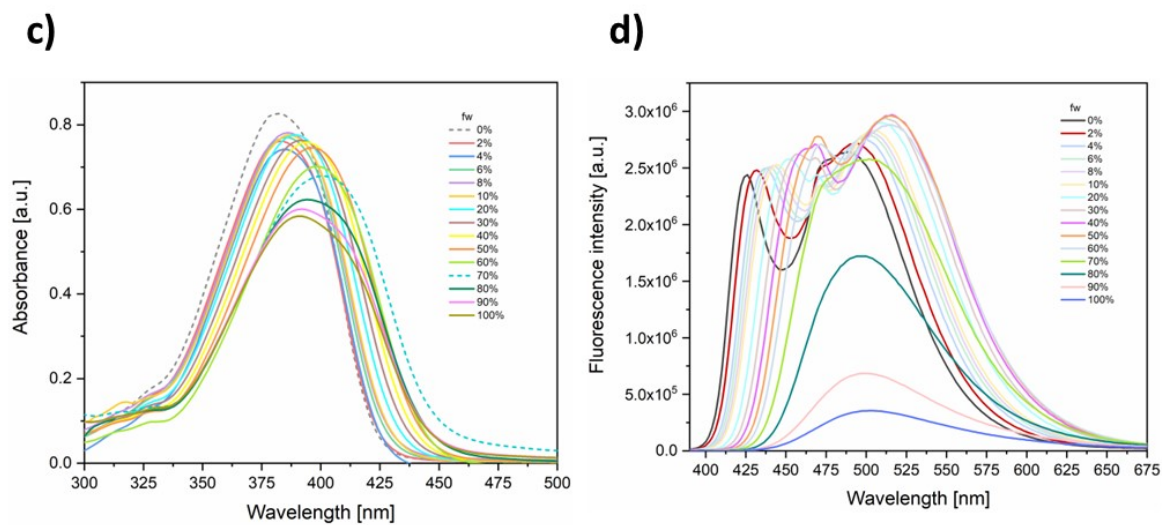

**Figure S29.** Absorption a), c) and emission b), d) spectra of 1,4-dioxane:water titration experiments of compound **4b**.

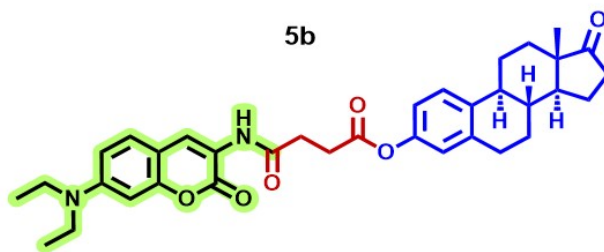

Low concentration  $3.3 \times 10^{-6}$  M

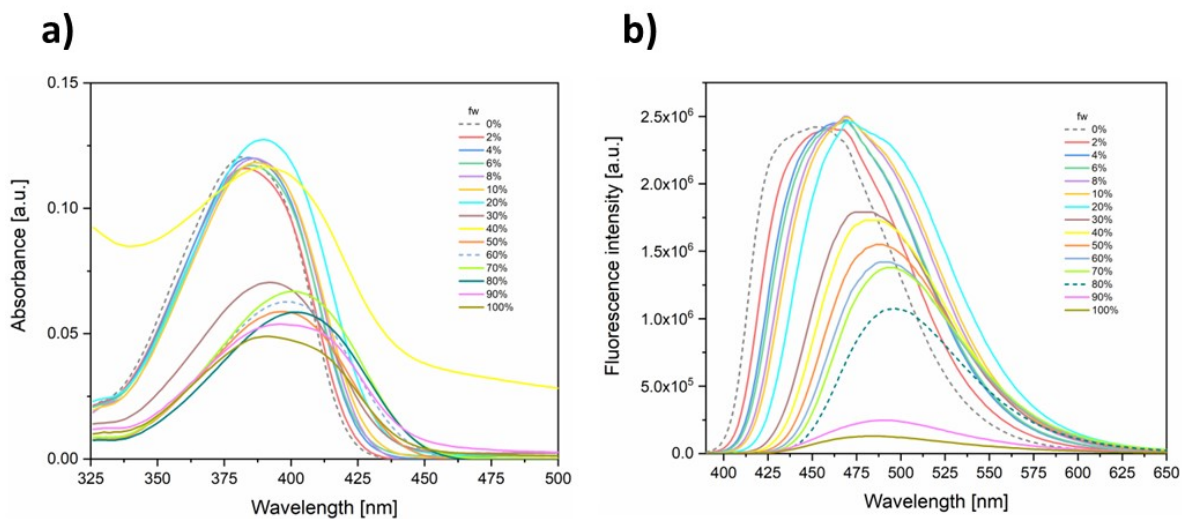

High concentration  $4.0 \times 10^{-5}$  M

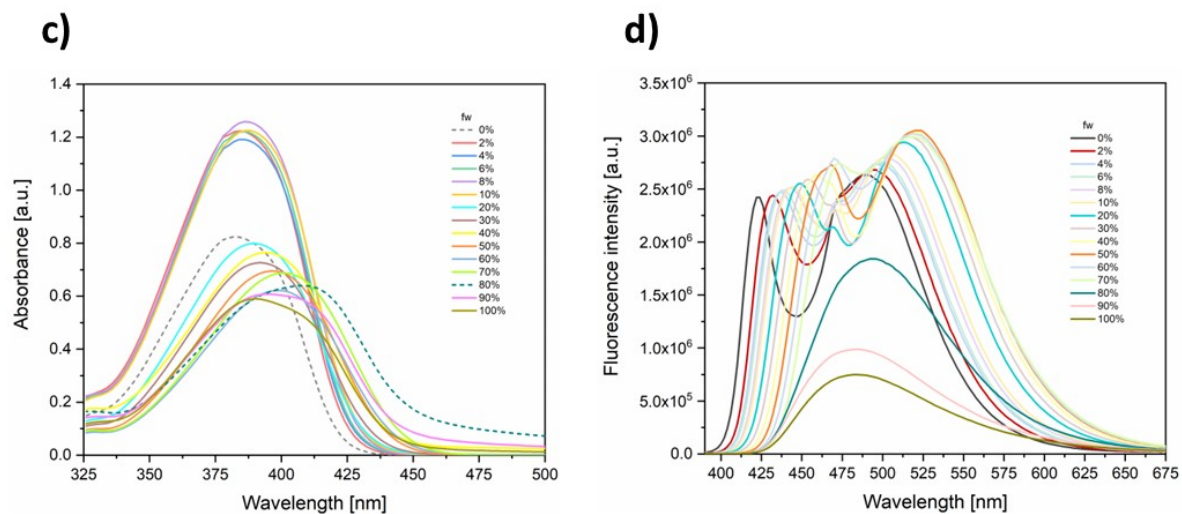

**Figure S30.** Absorption a), c) and emission b), d) spectra of 1,4-dioxane:water titration experiments of compound **5b**.



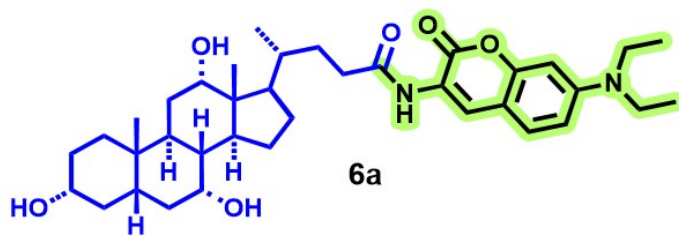

Low concentration  $3.3 \times 10^{-6}$  M

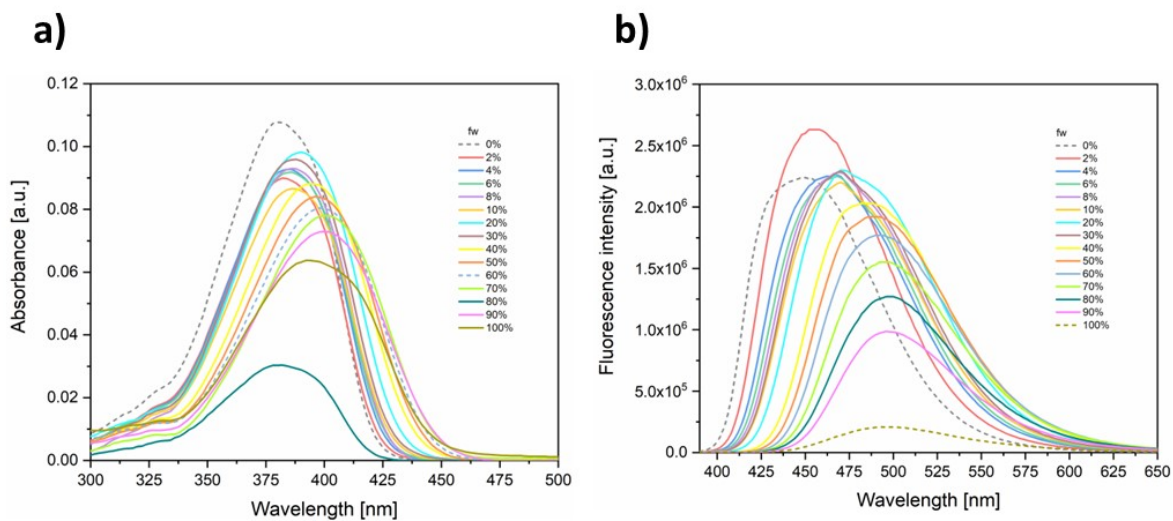

High concentration  $2.7 \times 10^{-5}$  M

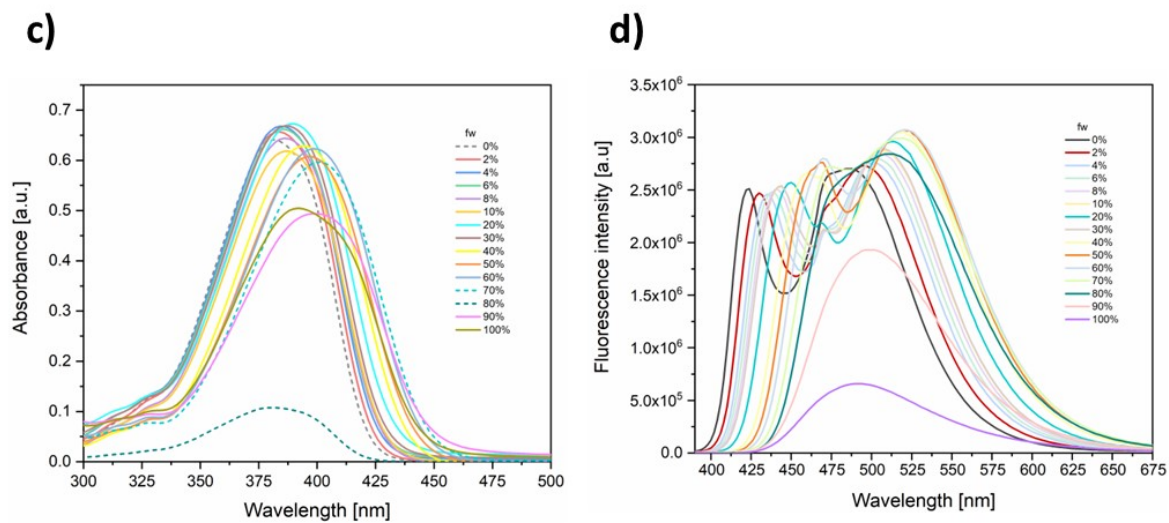

**Figure S31.** Absorption a), c) and emission b), d) spectra of 1,4-dioxane:water titration experiments of compound **6a**.

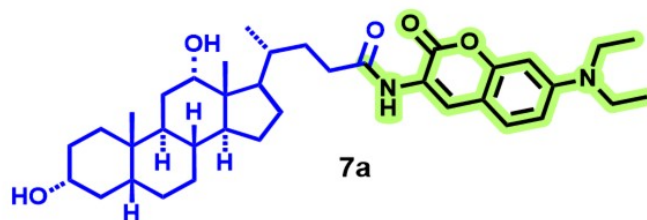

Low concentration  $3.3 \times 10^{-6}$  M

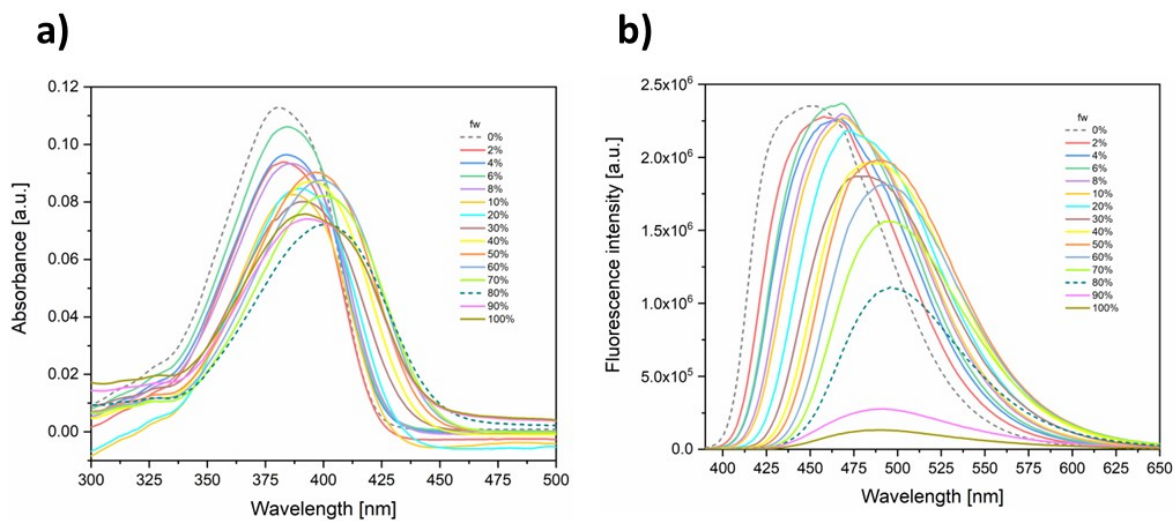

High concentration  $3.3 \times 10^{-5}$  M

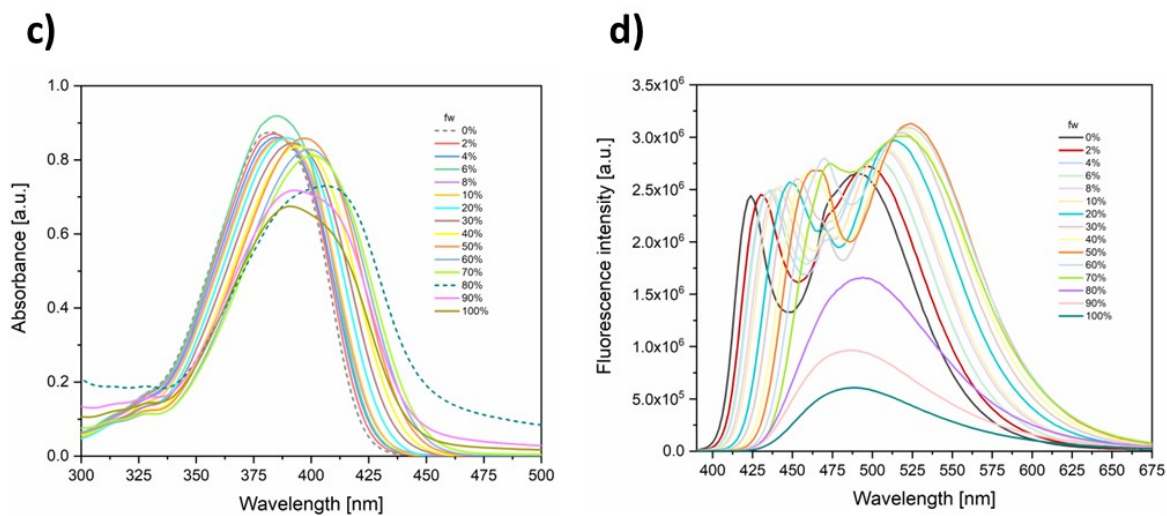

**Figure S32.** Absorption a), c) and emission b), d) spectra of 1,4-dioxane:water titration experiments of compound **7a**.

**Table S1.** Crystal Structure and Refinement Data of compounds **1b**, **2b**, **5b** and **6a**.

|                                            | <b>1b</b>                                                                                       | <b>2b</b>                                                                                      | <b>5b</b>                                                                                                  | <b>6a</b>                                                                                                    |
|--------------------------------------------|-------------------------------------------------------------------------------------------------|------------------------------------------------------------------------------------------------|------------------------------------------------------------------------------------------------------------|--------------------------------------------------------------------------------------------------------------|
| Empirical formula                          | C <sub>38</sub> H <sub>52</sub> N <sub>2</sub> O <sub>6</sub>                                   | C <sub>38</sub> H <sub>50</sub> N <sub>2</sub> O <sub>6</sub>                                  | C <sub>35</sub> H <sub>40</sub> N <sub>2</sub> O <sub>6</sub>                                              | C <sub>37</sub> H <sub>54</sub> N <sub>2</sub> O <sub>6</sub>                                                |
| Formula weight                             | 632.81                                                                                          | 630.80                                                                                         | 584.69                                                                                                     | 622.40                                                                                                       |
| Temperature (K)                            | 297(2)                                                                                          | 150(2)                                                                                         | 294(2)                                                                                                     | 295(2)                                                                                                       |
| Crystal system                             | Monoclinic                                                                                      | Monoclinic                                                                                     | Triclinic                                                                                                  | Triclinic                                                                                                    |
| Space group                                | <i>P2</i> <sub>1</sub>                                                                          | <i>P2</i> <sub>1</sub>                                                                         | <i>P1</i>                                                                                                  | <i>P1</i>                                                                                                    |
| Unit cell dimensions                       | a = 11.550(4) Å<br>b = 19.972(10) Å<br>c = 14.943(7) Å<br>α = 90°<br>β = 95.194(11)°<br>γ = 90° | a = 13.625(16) Å<br>b = 18.037(2) Å<br>c = 27.681(4) Å<br>α = 90°<br>β = 98.174(3)°<br>γ = 90° | a = 9.117(2) Å<br>b = 12.119(3) Å<br>c = 14.803(4) Å<br>α = 82.309(5)°<br>β = 78.830(5)°<br>γ = 70.106(5)° | a = 8.0067(18) Å<br>b = 10.661(2) Å<br>c = 23.119(5) Å<br>α = 79.169(6)°<br>β = 85.466(6)°<br>γ = 85.116(6)° |
| Volume Å <sup>3</sup>                      | 3433(3)                                                                                         | 6733.8(15)                                                                                     | 1504.8(7)                                                                                                  | 1927.1(7)                                                                                                    |
| Z                                          | 4                                                                                               | 8                                                                                              | 2                                                                                                          | 1                                                                                                            |
| Crystal size (mm <sup>3</sup> )            | 0.450 x 0.400 x<br>0.320                                                                        | 0.380 x 0.120 x<br>0.070                                                                       | 0.200 x 0.140 x<br>0.080                                                                                   | 0.410 x 0.400 x<br>0.390                                                                                     |
| Radiation type                             | Mo Kα                                                                                           | Mo Kα                                                                                          | Mo Kα                                                                                                      | Mo Kα                                                                                                        |
| θ Range (deg)                              | 2.043 to 26.717°.                                                                               | 2.230 to 24.569°                                                                               | 2.195 to 27.661                                                                                            | 2.291 to 20.858°                                                                                             |
| Reflns. collected/ unique                  | 85533                                                                                           | 44802                                                                                          | 67782                                                                                                      | 34535                                                                                                        |
| Independent reflections                    | 9953 [R(int) =<br>0.0590]                                                                       | 22411 [R(int) =<br>0.0000]                                                                     | 13840 [R(int) =<br>0.4845]                                                                                 | 7959 [R(int) =<br>0.0733]                                                                                    |
| Density (calculated<br>Mg/m <sup>3</sup> ) | 1.224                                                                                           | 1.244                                                                                          | 1.290                                                                                                      | 1.195                                                                                                        |
| Goodness-of-fit on F <sup>2</sup>          | 1.034                                                                                           | 1.056                                                                                          | 0.919                                                                                                      | 1.027                                                                                                        |
| Final R indices [I > 2σ (1)]               | R1 = 0.0480, wR2<br>= 0.1143                                                                    | R1 = 0.0827,<br>wR2 = 0.1664                                                                   | R1 = 0.0948,<br>wR2 = 0.1588                                                                               | R1 = 0.0878,<br>wR2 = 0.2270                                                                                 |
| R indices (all data)                       | R1 = 0.0831, wR2<br>= 0.1316                                                                    | R1 = 0.1900,<br>wR2 = 0.2160                                                                   | R1 = 0.4132,<br>wR2 = 0.2592                                                                               | R1 = 0.1180,<br>wR2 = 0.2608                                                                                 |

**Table S2.** Hydrogen-bonding parameters (Å, °) for **1b**, **2b**, **5b** and **6a**.

|                                                                                                            | D-H...A                                     | D-H  | H...A | D...A     | D-H...A |
|------------------------------------------------------------------------------------------------------------|---------------------------------------------|------|-------|-----------|---------|
| <b>1b</b>                                                                                                  | N1-H1...O1A                                 | 0.86 | 2.33  | 3.129(5)  | 154     |
|                                                                                                            | C38-H38C...O20 <sup>i</sup>                 | 0.96 | 2.64  | 3.307(8)  | 127     |
|                                                                                                            | C4A-H4A <sub>eq</sub> ...O4                 | 0.97 | 2.64  | 3.134(5)  | 112     |
|                                                                                                            | C24-H24B...O1A                              | 0.97 | 2.63  | 3.259(6)  | 123     |
|                                                                                                            | C35-H35D...O20A <sup>ii</sup>               | 0.97 | 2.44  | 2.394(5)  | 168     |
| Symmetry codes: (i) x+2, y, z-1; (ii) x-2, y, z+1; (iii) -x-1, y-1/2, -z+1.                                |                                             |      |       |           |         |
| <b>2b</b>                                                                                                  | N1-H1...O2A                                 | 0.88 | 2.14  | 3.000(9)  | 166     |
|                                                                                                            | N1A-H5...O2                                 | 0.88 | 2.16  | 3.015(9)  | 165     |
|                                                                                                            | C24B-H90B...O22A                            | 0.99 | 2.63  | 3.480(14) | 143     |
|                                                                                                            | C24B-H90A...O2C                             | 0.99 | 2.49  | 3.292(12) | 141     |
|                                                                                                            | C31-H20B...O25A <sup>i</sup>                | 0.95 | 2.62  | 3.352(11) | 135     |
|                                                                                                            | C37-H22B...O20 <sup>ii</sup>                | 0.99 | 2.61  | 3.454(13) | 143     |
|                                                                                                            | C21A-H61A...O22 <sup>iii</sup>              | 0.98 | 2.59  | 3.488(16) | 153     |
| Symmetry codes: (i) x-1, y, z; (ii) x-1, y, z-1; (iii) -x+1, y-1/2, -z+1; (iv) x+1, y, z+1; (v) x+1, y, z. |                                             |      |       |           |         |
| <b>5b</b>                                                                                                  | N1-H1...O2A                                 | 0.86 | 2.18  | 3.011(14) | 161     |
|                                                                                                            | N1A-H1AC...O2                               | 0.86 | 2.09  | 2.918(14) | 162     |
|                                                                                                            | C21A <sup>a</sup> -H21A <sup>a</sup> ...O2  | 0.97 | 2.61  | 3.19(3)   | 118     |
|                                                                                                            | C21C <sup>b</sup> -H21B <sup>b</sup> ...O2  | 0.97 | 2.47  | 3.32(4)   | 145     |
|                                                                                                            | C20A <sup>a</sup> -H20B <sup>a</sup> ...O1A | 0.97 | 2.57  | 3.53(4)   | 167     |
|                                                                                                            | C33B <sup>b</sup> -H33D <sup>b</sup> ...O17 | 0.96 | 2.43  | 3.35(5)   | 159     |
| <b>6a</b>                                                                                                  | O3-H3A...O7A                                | 0.84 | 2.07  | 2.860(12) | 158     |
|                                                                                                            | O3A-H3AA...O7                               | 1.10 | 1.80  | 2.865(15) | 163     |
|                                                                                                            | O12A-H7A...O3                               | 0.66 | 2.43  | 2.880(15) | 128     |
|                                                                                                            | C38-H1A...O12A                              | 0.98 | 2.26  | 3.180(2)  | 155     |
|                                                                                                            | N1A-H1...O2A                                | 0.86 | 2.13  | 2.963(15) | 164     |

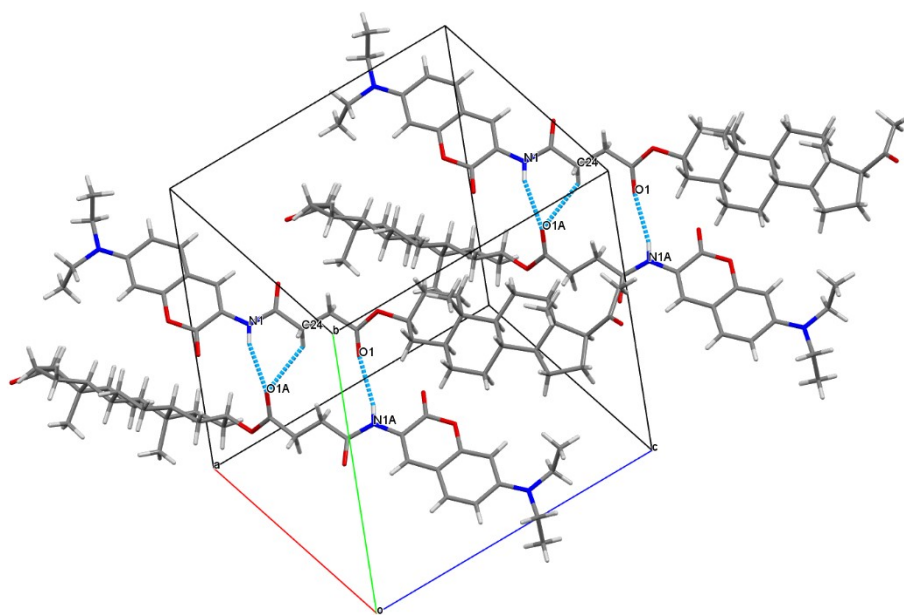

**Figure S33.** Unit cell and hydrogen bonds interactions of compound **1b**.

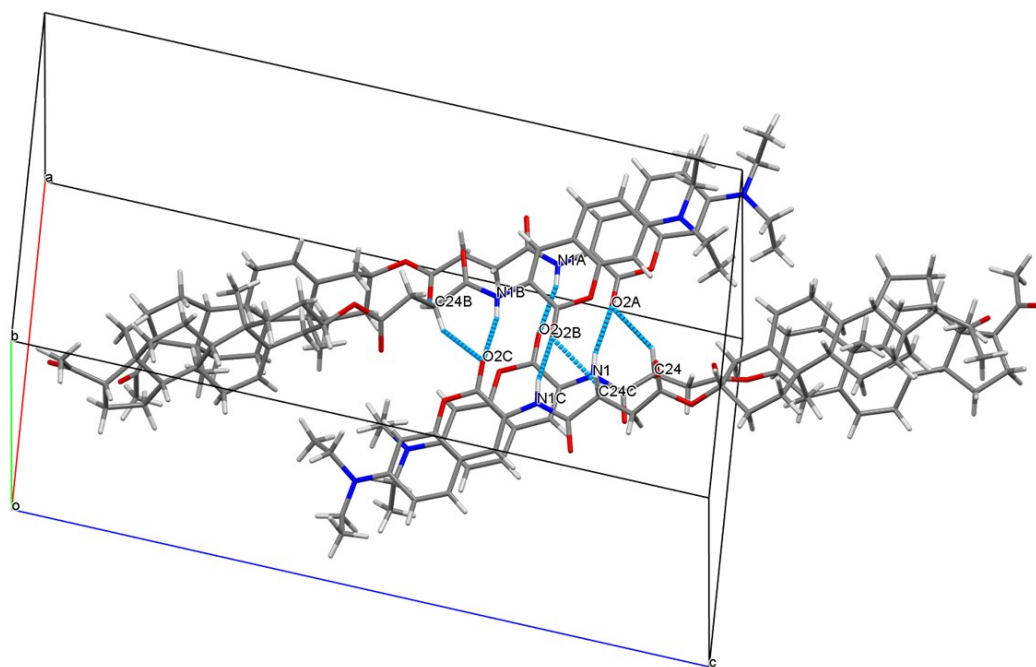

**Figure S34.** Unit cell and hydrogen bonds interactions of compound **2b**.

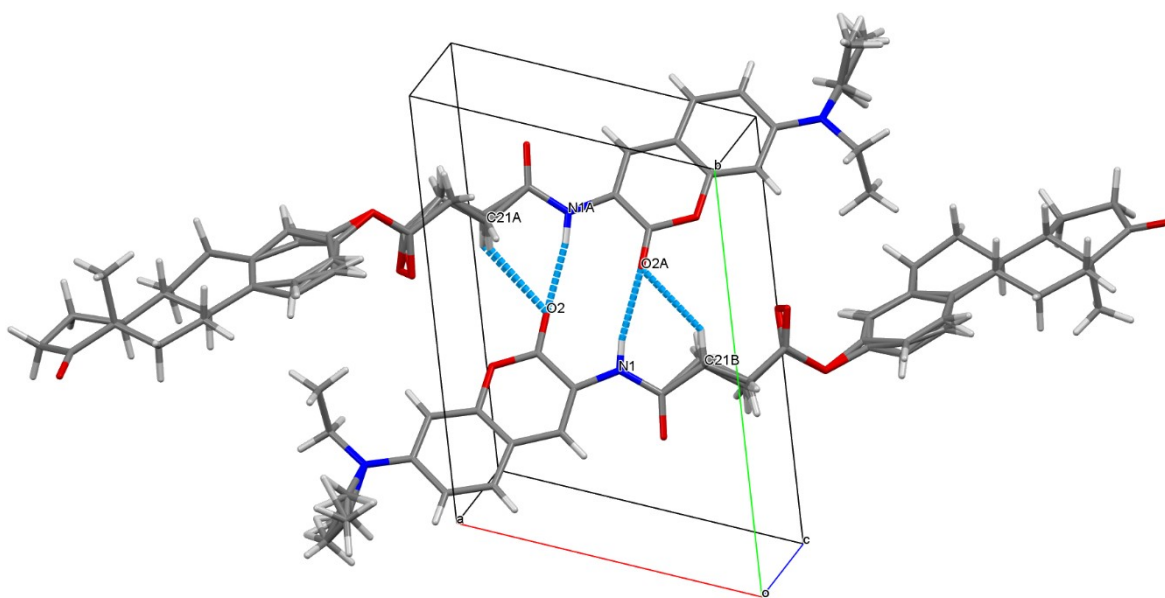

**Figure S35.** Unit cell and hydrogen bonds interactions of compound **5b**.

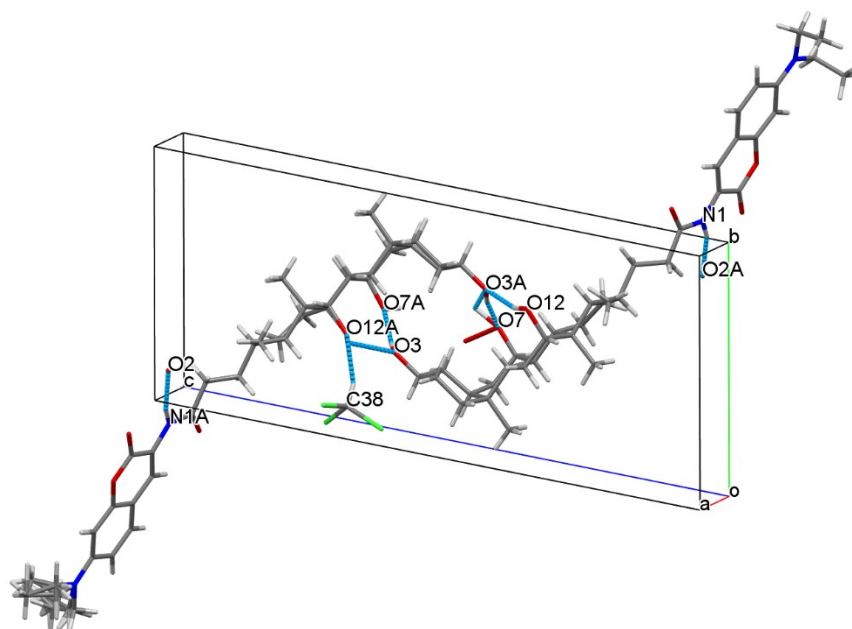

**Figure S36.** Unit cell and hydrogen bonds interactions of compound **6a**.



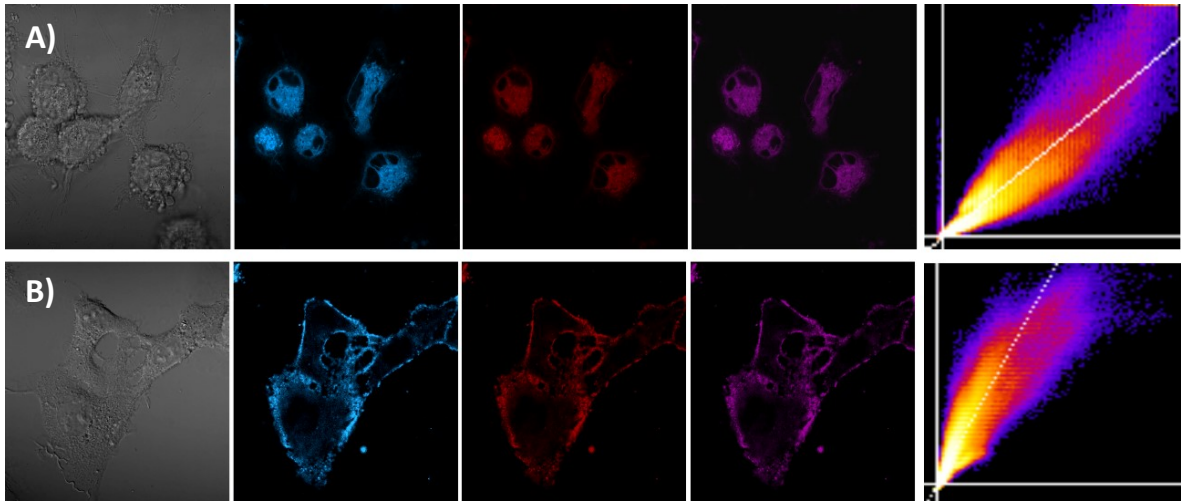

**Figure S37.** Colocalization images of A)6a and B)5b (Figure 10).

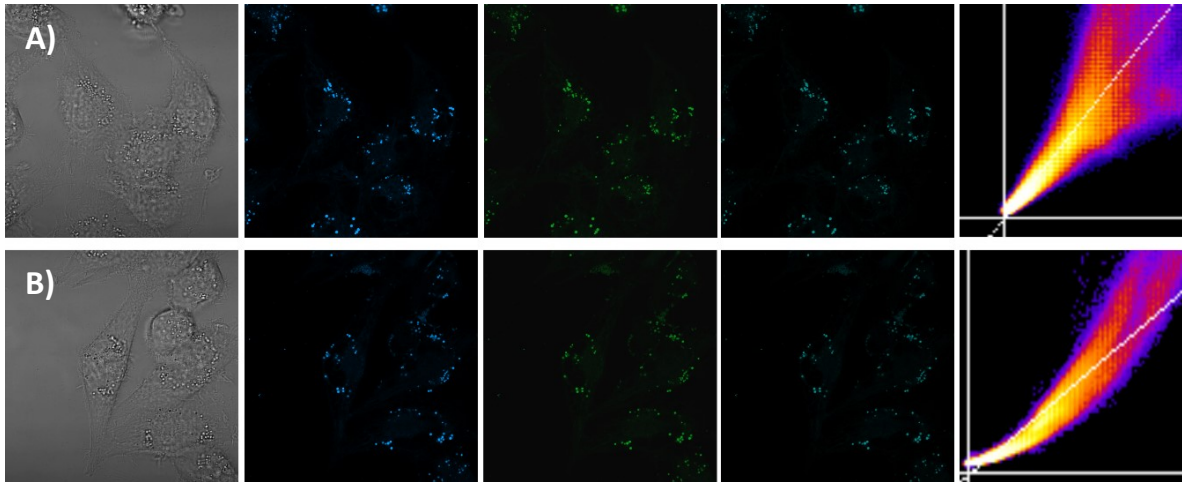

**Figure S38.** Colocalization images of A)2b and B)1b (Figure 11).

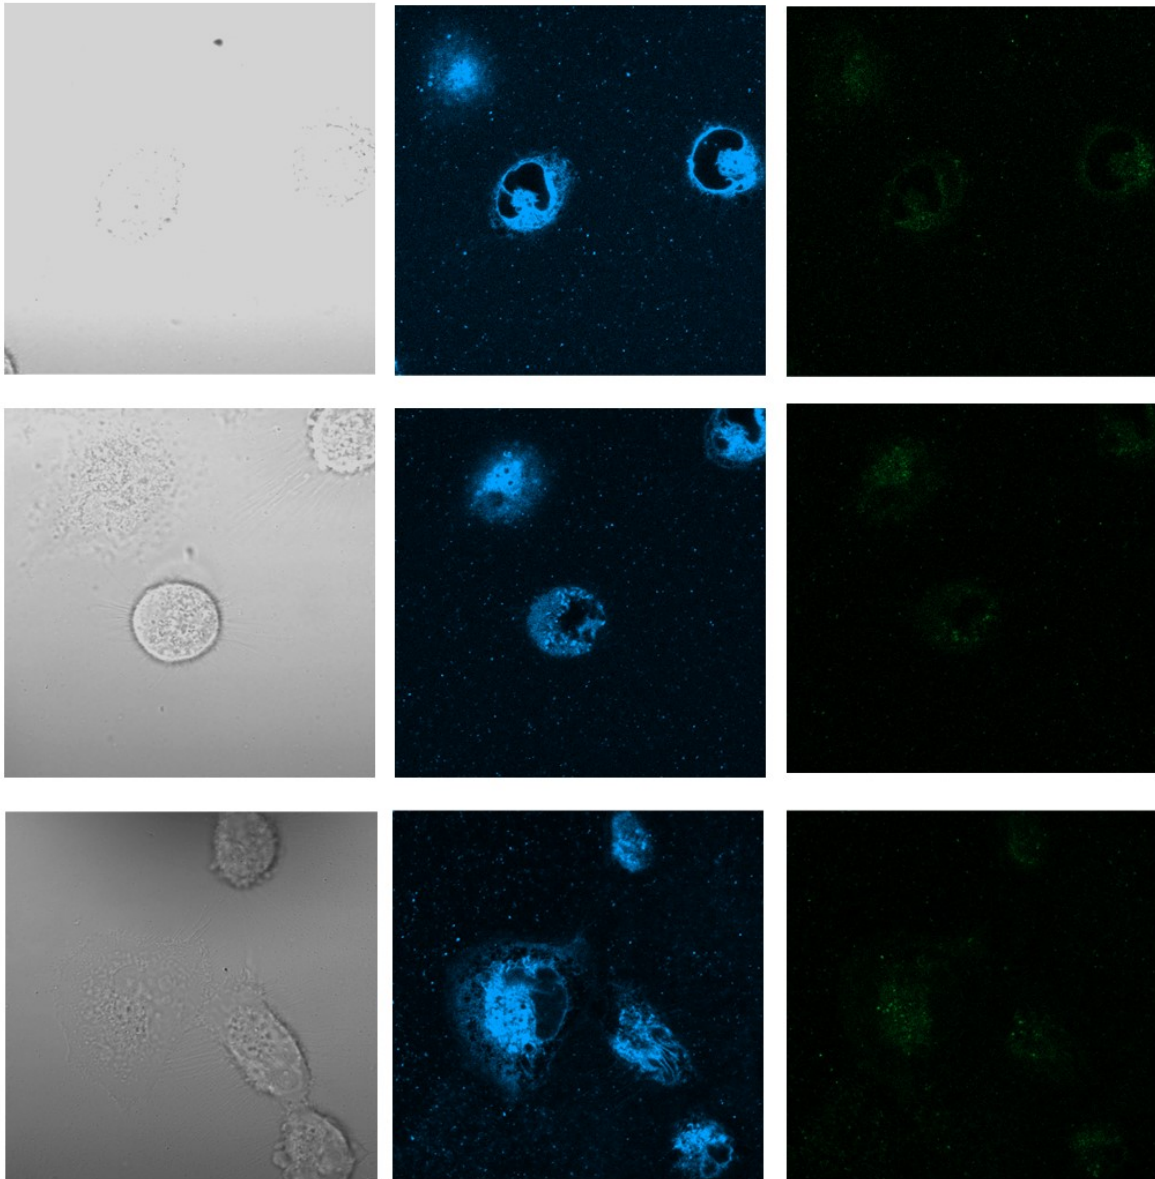

**Figure S39.** Fluorescence microscopy images of compound **3b** in U-251 cells.



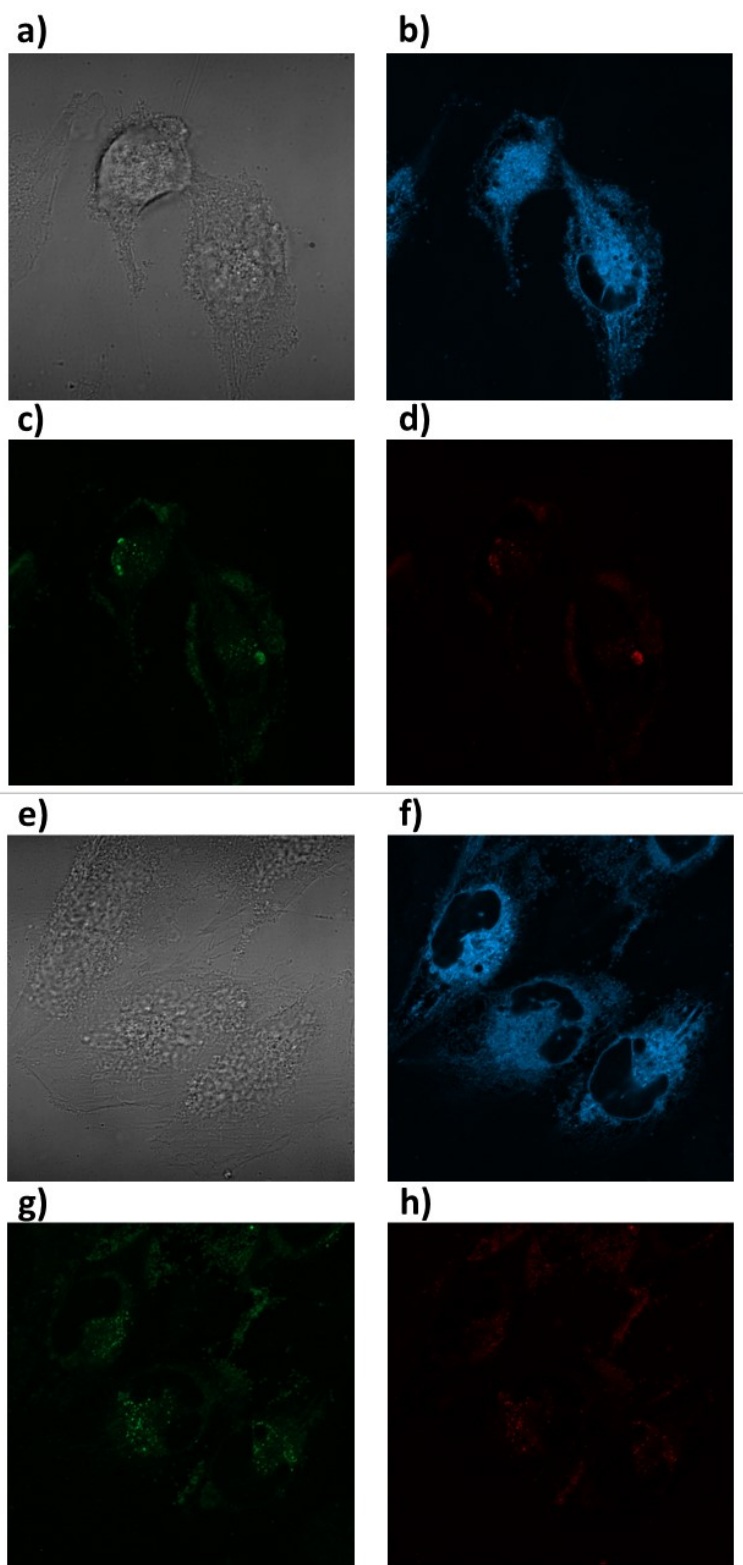

**Figure S40.** Fluorescence microscopy images of compound **4b** in U-251 cells.

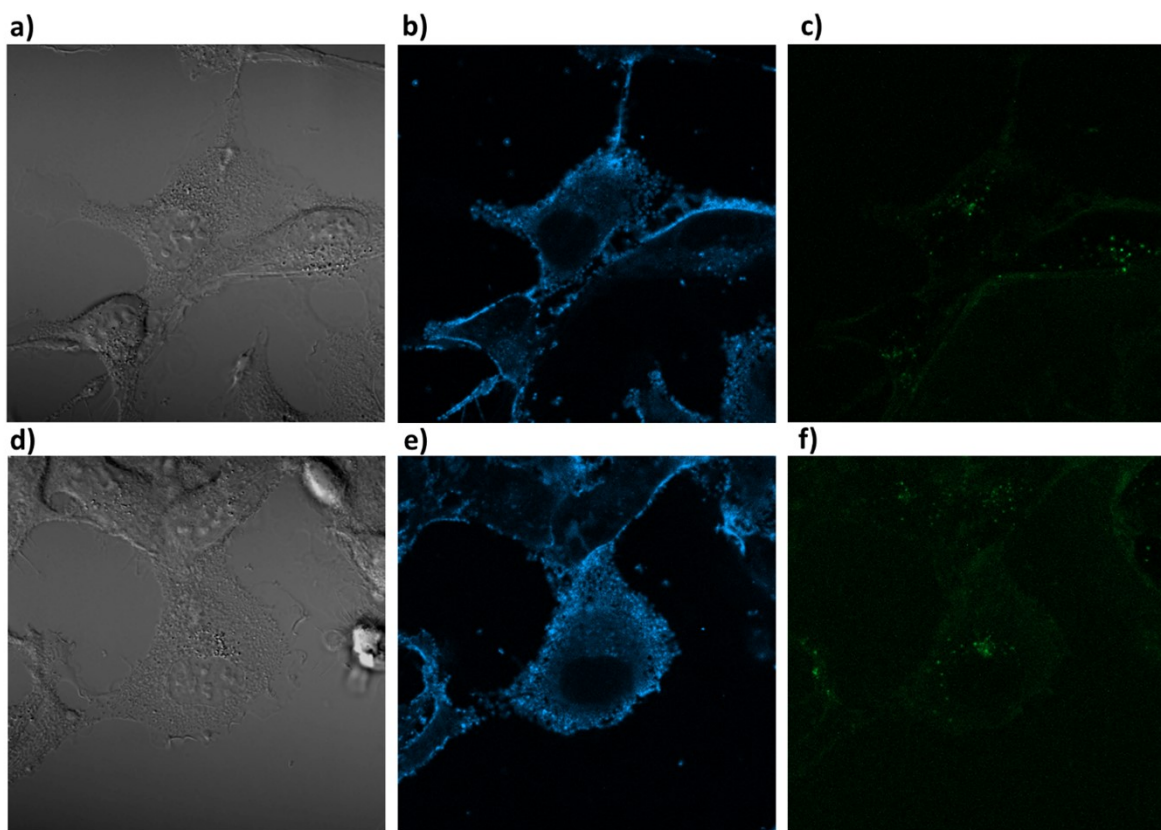

**Figure S41.** Fluorescence microscopy images of compound **5b** in U-251 cells.

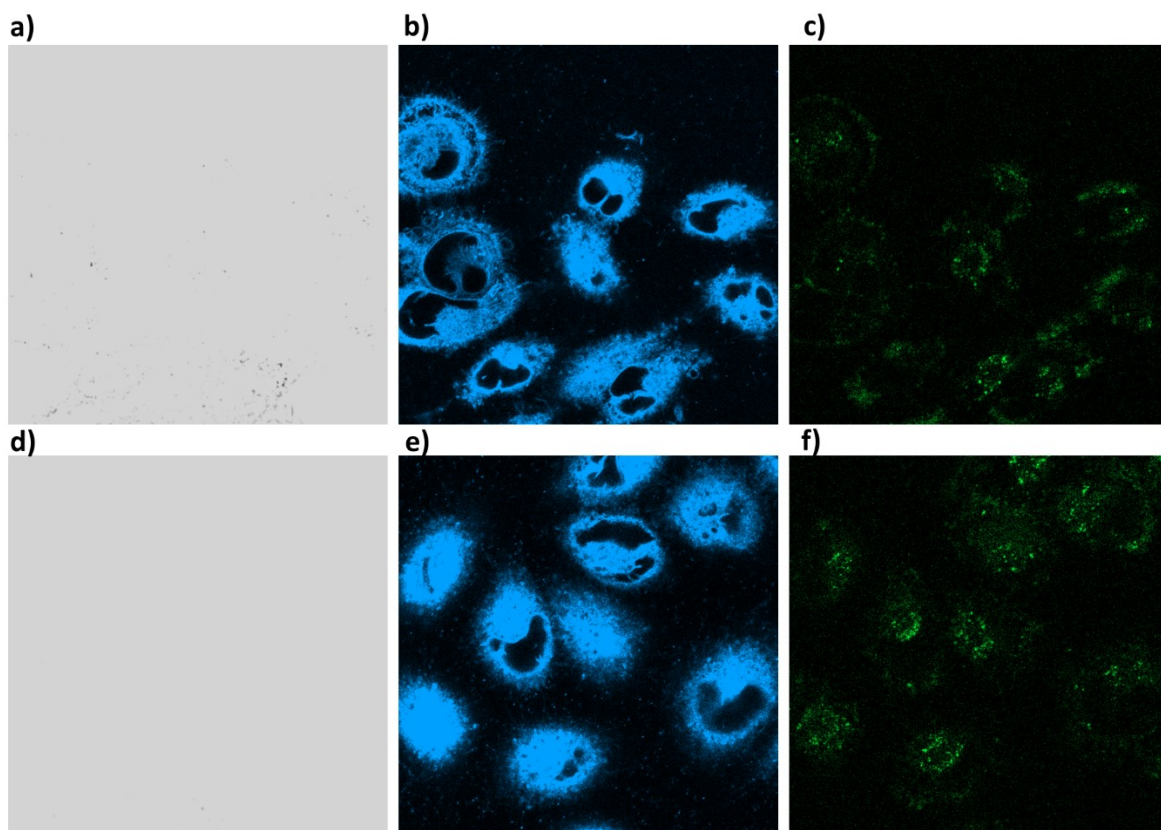

**Figure S42.** Fluorescence microscopy images of compound **7a** in U-251 cells.
